# Supplementary material for: Methodology and model-based DSS to managing the reallocation of inventory to orders in LHP situations. Application to the ceramics sector
Source: PLoS One. 2019 Jul 11;14(7):e0219433. doi: 10.1371/journal.pone.0219433 (PMC6622491; doi:10.1371/journal.pone.0219433)
Supplement: S1 File — (XLSX) [file pone.0219433.s001.xlsx]

## Sheet: Pedido
SalesOrderCode	Benefit	NumberOfLines	Status	DeliveryDate
2100019906	0	4	P_Complete	2016-01-30
2100123908	0	17	P_Complete	2016-05-10
2100126181	0	1	P_Complete	2016-03-02
2100128690	0	3	P_Complete	2016-03-25
2100132099	0	1	P_Complete	2016-04-30
2100132597	0	1	P_Complete	2016-01-05
2100133576	0	6	P_Complete	2016-01-17
2100136559	0	1	P_Complete	2016-02-21
2100137101	0	1	P_Complete	2016-02-28
2100139070	0	7	P_Complete	2016-09-03
2100139650	0	1	P_Complete	2016-09-11
2100140860	0	13	P_Complete	2016-09-29
2100143286	0	4	P_Complete	2016-10-30
2100143292	0	2	P_Complete	2016-10-30
2100143501	0	10	P_Complete	2016-11-03
2100144098	0	2	P_Complete	2016-11-11
2100144320	0	5	P Line missing	2016-11-13
2100144328	0	4	P_Complete	2016-11-13
2100144329	0	2	P_Complete	2016-11-13
2100144334	0	3	P_Complete	2016-11-13
2100144337	0	1	P_Complete	2016-11-13
2100144598	0	3	P_Complete	2016-11-18
2100145099	0	1	P_Complete	2016-11-25
2100146501	0	1	P_Complete	2016-12-16
2100146526	0	1	P_Complete	2016-12-16
2100146581	0	1	P_Complete	2016-12-16
2100146736	0	1	P_Complete	2016-12-18
2100147601	0	1	P_Complete	2016-07-12
2100148973	0	3	P_Complete	2016-07-30
2100148978	0	7	P_Complete	2016-07-30
2100149419	0	1	P_Complete	2016-06-05
2100149548	0	1	P_Complete	2016-06-06
2100150138	0	1	P_Complete	2016-06-16
2100150294	0	1	P_Complete	2016-06-17
2100150343	0	1	P_Complete	2016-06-18
2100150586	0	6	P_Complete	2016-06-20
2100150591	0	5	P_Complete	2016-06-20
2100152133	0	2	P_Complete	2016-05-12
2100152137	0	2	P_Complete	2016-05-12
2100152641	0	1	P_Complete	2016-05-23
2100153561	0	1	P_Complete	2016-03-02
2100153753	0	1	P_Complete	2016-03-03
2100153772	0	1	P_Complete	2016-03-03
2100153774	0	1	P_Complete	2016-03-03
2100153775	0	2	P_Complete	2016-03-03
2100153776	0	2	P_Complete	2016-03-03
2100153883	0	1	P_Complete	2016-03-06
2100155288	0	5	P_Complete	2016-03-28
2100155290	0	1	P_Complete	2016-03-29
2100155398	0	2	P_Complete	2016-03-29
2100155497	0	3	P_Complete	2016-03-30
2100155800	0	3	P_Complete	2016-04-06
2100156075	0	5	P_Complete	2016-04-11
2100156919	0	1	P_Blank	2016-04-20
2100157497	0	11	P_Complete	2016-04-27
2100157588	0	1	P_Complete	2016-04-28
2100158162	0	2	P_Complete	2016-01-04
2100158191	0	2	P_Complete	2016-01-05
2100158427	0	2	P_Complete	2016-01-09
2100159779	0	1	P_Blank	2016-01-25
2100160440	0	5	P_Complete	2016-02-02
5100142308	0	2	P_Complete	2016-05-30
5100093910	1	1	P_Blank	2016-01-24
5100150295	1.7779	1	P_Complete	2016-01-25
5100094142	3.64	1	P_Complete	2016-01-30
5100134973	3.64	1	P_Complete	2016-12-30
5100094233	5.02	1	P_Blank	2016-02-03
5100149728	5.02	1	P_Complete	2016-01-20
5100093844	5.23	1	P_Complete	2016-01-23
5100094230	5.58	1	P_Blank	2016-02-07
5100093909	5.74	1	P_Blank	2016-01-24
6100098621	5.78	1	P_Blank	2016-02-07
2100160508	5.89	1	P_Complete	2016-02-08
5100148888	6.07	1	P_Complete	2016-01-10
2100160559	6.45	1	P_Complete	2016-02-03
6100098727	6.64	1	P_Complete	2016-02-06
6100098798	6.64	1	P_Complete	2016-02-28
6100098619	6.77	1	P_Complete	2016-02-14
2100159418	6.97	1	P_Blank	2016-01-19
6100098477	7	1	P_Blank	2016-01-29
6100098750	7	1	P_Complete	2016-02-07
6100098787	7	1	P_Complete	2016-02-10
5100150505	7.29	1	P_Complete	2016-01-29
6100098769	7.57	1	P_Blank	2016-02-07
6100098771	7.57	1	P_Complete	2016-02-28
6100098801	7.62	1	P_Complete	2016-02-14
6100098797	8.11	1	P_Complete	2016-02-06
6100098763	8.13	1	P_Complete	2016-02-06
6100098355	8.33	1	P_Complete	2016-01-24
5100150861	8.47	1	P_Complete	2016-02-02
6100098193	8.52	1	P_Blank	2016-01-19
6100097804	8.86	1	P_Complete	2016-01-09
6100098785	8.86	1	P_Complete	2016-02-07
6100003120	9.05	2	P Line missing	2016-02-08
5100094461	9.09	1	P_Complete	2016-02-07
6100096458	9.23	1	P_Complete	2016-03-27
5100151212	9.26	1	P_Complete	2016-02-09
6100088884	9.54	1	P_Complete	2016-09-10
5100094416	9.79	1	P_Complete	2016-02-04
2100160243	10.06	1	P_Complete	2016-01-30
2100147422	10.1	1	P_Complete	2016-07-25
5100150923	10.24	1	P_Complete	2016-02-06
5100147081	10.41	2	P_Complete	2016-04-20
5100150856	10.59	1	P_Complete	2016-02-02
5100151110	10.59	1	P_Complete	2016-02-09
5100147287	10.86	1	P_Complete	2016-04-22
5100150820	10.88	1	P_Complete	2016-02-01
5100142754	10.98	1	P_Complete	2016-05-28
6100098791	11	1	P_Complete	2016-02-06
5100151022	11.03	1	P_Complete	2016-02-07
2100159760	11.35	1	P_Complete	2016-01-26
6100098795	11.36	1	P_Complete	2016-02-06
5100094346	11.77	1	P_Complete	2016-02-07
5100150517	11.77	1	P_Complete	2016-01-29
5100094505	11.87	2	P_Complete	2016-02-09
2100149571	12.15	1	P_Blank	2016-06-09
2100160528	12.75	1	P_Complete	2016-02-03
2100160684	12.75	1	P_Blank	2016-02-13
5100094176	12.87	1	P_Complete	2016-02-02
2100160688	13.04	1	P_Complete	2016-02-06
5100094170	13.17	1	P_Complete	2016-01-30
6100095706	13.18	1	P_Complete	2016-05-30
6100098690	13.29	1	P_Complete	2016-02-02
2100160667	13.36	1	P_Complete	2016-02-08
5100094046	13.51	1	P_Complete	2016-02-02
5100150626	13.56	1	P_Blank	2016-02-01
2100159331	13.91	1	P_Complete	2016-01-18
5100150569	13.98	1	P_Complete	2016-01-30
2100157812	14	1	P_Blank	2016-01-30
5100149917	14.16	1	P_Complete	2016-01-25
5100093871	14.22	1	P_Complete	2016-01-24
5100093950	14.22	1	P_Complete	2016-01-24
5100094533	14.22	1	P_Complete	2016-02-13
6100098242	14.25	1	P_Complete	2016-11-24
5100148694	14.28	1	P_Complete	2016-01-09
6100088785	14.28	1	P_Complete	2016-09-10
5100093640	14.65	1	P_Blank	2016-01-18
5100151069	14.98	1	P_Complete	2016-02-09
5100093801	15.07	1	P_Blank	2016-01-22
5100094129	15.07	1	P_Blank	2016-01-30
5100094378	15.07	1	P_Blank	2016-02-07
6100098108	15.25	1	P_Complete	2016-01-17
6100098790	15.25	1	P_Complete	2016-02-08
5100093945	15.77	1	P_Complete	2016-01-25
2100158703	15.82	1	P_Complete	2016-01-11
5100149773	16.07	1	P_Blank	2016-01-23
5100151259	16.21	1	P_Complete	2016-02-07
5100148069	16.35	1	P_Complete	2016-01-03
5100150770	16.57	1	P_Complete	2016-02-07
5100151275	16.57	1	P_Complete	2016-02-07
5100151133	16.69	1	P_Complete	2016-02-08
5100092906	16.79	1	P_Complete	2016-01-10
2100021494	16.83	1	P_Blank	2016-01-30
2100160529	16.93	1	P_Complete	2016-02-03
2100159597	17.09	1	P_Blank	2016-01-23
5100091817	17.23	20	P_Complete	2016-04-30
5100091853	17.66	1	P_Complete	2016-04-13
5100093787	17.66	1	P_Complete	2016-01-24
5100094053	17.66	1	P_Complete	2016-02-02
5100094109	17.66	1	P_Complete	2016-01-29
5100151187	17.66	1	P_Complete	2016-02-10
2100160491	17.81	1	P_Complete	2016-02-08
5100094182	17.99	2	P Line missing	2016-02-03
5100150915	18	1	P_Complete	2016-02-03
5100149920	18.09	1	P_Complete	2016-01-25
5100094427	18.23	1	P_Complete	2016-02-07
5100094080	18.33	1	P_Blank	2016-01-27
5100151264	19.63	2	P_Complete	2016-02-07
5100151282	19.76	2	P Line missing	2016-02-07
2100158328	19.79	1	P_Complete	2016-01-08
6100094776	19.8	1	P_Complete	2016-05-03
5100094016	20.05	1	P_Blank	2016-01-26
5100094498	20.13	1	P_Complete	2016-02-07
6100098780	20.3	1	P_Complete	2016-02-10
2100160595	20.49	1	P_Blank	2016-02-06
6100098729	20.5	1	P_Complete	2016-02-09
6100087162	20.77	1	P_Complete	2016-02-25
5100151077	20.82	1	P_Complete	2016-02-05
5100148124	21.04	1	P_Complete	2016-01-04
5100148935	21.1	1	P_Complete	2016-01-09
5100151183	21.1	1	P_Complete	2016-02-10
5100151089	21.42	1	P_Complete	2016-02-10
5100094236	21.44	1	P_Blank	2016-02-01
5100151093	21.6	1	P_Blank	2016-02-04
2100154319	21.71	1	P_Blank	2016-03-15
6100098712	22.1	1	P_Complete	2016-02-03
5100094475	22.27	1	P_Blank	2016-02-07
2100160484	22.54	1	P_Complete	2016-02-03
5100093651	22.56	1	P_Blank	2016-01-18
5100093143	22.61	1	P_Complete	2016-01-12
2100160141	22.66	1	P_Complete	2016-01-29
6100098313	23.04	1	P_Complete	2016-11-22
6100098741	23.07	1	P_Complete	2016-02-03
5100093478	23.1	1	P_Blank	2016-01-16
5100150806	23.52	1	P_Complete	2016-02-07
5100151050	23.54	1	P_Complete	2016-02-06
5100151181	23.54	2	P_Complete	2016-02-07
5100151053	23.61	2	P_Complete	2016-02-04
2100160527	23.76	1	P_Complete	2016-02-28
2100160600	24.24	2	P_Complete	2016-02-06
2100160391	24.29	1	P_Complete	2016-02-06
2100160577	24.49	1	P_Complete	2016-02-06
5100093544	24.54	1	P_Blank	2016-01-17
2100160471	24.73	2	P_Complete	2016-02-03
2100159539	24.99	1	P_Complete	2016-01-22
5100150972	25	1	P_Complete	2016-02-28
5100150572	25.04	1	P_Blank	2016-02-02
5100091250	25.12	1	P_Complete	2016-03-28
6100098159	25.56	1	P_Complete	2016-01-18
5100150903	25.91	1	P_Complete	2016-02-02
5100094286	25.95	1	P_Blank	2016-02-01
5100146672	26.03	1	P_Complete	2016-04-14
6100095659	26.4	1	P_Complete	2016-05-27
5100151025	26.5	1	P_Complete	2016-02-10
6100095983	26.57	1	P_Complete	2016-03-07
6100098460	26.57	1	P_Complete	2016-11-25
5100151135	26.6	1	P_Complete	2016-02-07
5100151036	26.71	1	P_Complete	2016-02-09
5100090968	26.78	1	P_Complete	2016-03-23
5100093261	26.78	1	P_Complete	2016-01-11
2100159114	26.91	3	P_Complete	2016-01-17
2100159530	27.47	1	P_Blank	2016-01-23
5100094200	27.9	1	P_Complete	2016-02-01
6100098779	27.95	5	P_Complete	2016-02-08
6100096242	28.32	1	P_Complete	2016-03-22
5100151104	28.42	1	P_Complete	2016-02-09
5100094527	28.44	1	P_Complete	2016-09-07
5100093868	28.45	1	P_Complete	2016-01-23
5100094206	28.45	1	P_Blank	2016-02-01
5100151255	28.87	2	P_Complete	2016-02-07
2100160671	29.68	1	P_Complete	2016-02-06
5100150771	30.36	1	P_Complete	2016-02-07
5100094071	30.55	1	P_Blank	2016-01-27
5100093960	31.34	1	P_Blank	2016-01-30
5100094118	32	1	P_Complete	2016-01-29
6100098703	32	1	P_Complete	2016-02-03
5100092700	32.56	1	P_Complete	2016-04-29
5100094422	32.56	1	P_Complete	2016-02-04
5100147874	32.56	1	P_Complete	2016-01-25
2100021352	32.97	1	P_Blank	2016-04-19
5100149958	33.25	1	P_Complete	2016-01-25
5100094158	33.27	1	P_Complete	2016-01-30
5100151044	33.45	1	P_Complete	2016-02-04
5100151026	33.5	1	P_Complete	2016-02-10
5100151202	33.5	1	P_Complete	2016-02-09
5100151052	33.77	2	P_Complete	2016-02-06
5100092362	34.44	1	P_Complete	2016-04-21
2100160668	34.62	2	P_Complete	2016-02-09
5100151191	34.7	1	P_Complete	2016-02-10
5100151128	34.75	1	P_Complete	2016-02-09
5100151154	34.87	1	P_Complete	2016-02-07
5100093678	35.1	1	P_Blank	2016-01-19
5100094531	35.33	1	P_Complete	2016-02-07
5100151087	35.33	1	P_Complete	2016-02-07
5100151120	35.33	1	P_Complete	2016-02-06
2100160651	35.42	1	P_Complete	2016-02-07
5100151015	35.43	2	P_Complete	2016-02-10
2100160510	35.7	1	P_Complete	2016-02-08
5100151111	35.7	1	P_Blank	2016-02-04
6100098464	35.7	1	P_Blank	2016-01-26
5100150084	35.77	1	P_Complete	2016-01-24
5100093803	36.18	1	P_Blank	2016-01-22
5100094382	36.18	1	P_Blank	2016-02-07
2100160450	36.26	1	P_Blank	2016-02-07
5100151265	36.57	1	P_Complete	2016-02-09
5100151142	36.63	1	P_Complete	2016-02-09
5100093828	36.66	1	P_Blank	2016-01-23
5100093893	36.66	1	P_Blank	2016-01-24
2100160649	36.9	1	P_Complete	2016-02-07
2100159595	36.99	1	P_Blank	2016-01-25
6100098558	37.62	1	P_Blank	2016-01-30
6100098711	37.68	1	P_Blank	2016-02-03
5100145481	37.75	1	P_Complete	2016-03-30
5100145567	38	2	P_Complete	2016-04-15
6100097502	38.04	1	P_Complete	2016-01-01
5100094440	39.26	1	P_Complete	2016-02-04
5100150331	39.26	1	P_Complete	2016-01-26
6100092681	39.35	1	P_Complete	2016-12-17
5100143313	40.43	1	P_Complete	2016-03-10
5100094048	40.7	1	P_Blank	2016-01-26
5100148225	40.7	1	P_Complete	2016-01-17
2100160526	41	1	P_Complete	2016-02-03
5100148179	41	1	P_Blank	2016-01-02
5100149336	41.48	1	P_Blank	2016-01-16
5100091051	41.63	1	P_Complete	2016-03-23
2100160493	41.74	1	P_Complete	2016-02-03
5100093766	41.91	2	P_Complete	2016-01-19
5100150702	41.92	2	P_Complete	2016-02-03
5100094406	42.88	1	P_Blank	2016-02-03
2100156649	43	1	P_Complete	2016-04-18
5100092371	43.2	1	P_Blank	2016-01-11
5100150463	43.9	1	P_Complete	2016-01-27
5100151027	44.22	3	P_Complete	2016-02-09
2100160653	44.28	1	P_Complete	2016-02-07
5100143819	44.36	1	P_Complete	2016-03-09
5100094467	44.38	1	P_Complete	2016-02-05
5100151035	44.94	1	P_Complete	2016-02-10
5100092305	44.99	1	P_Blank	2016-04-20
2100160478	45.08	1	P_Complete	2016-02-03
5100093829	45.12	1	P_Blank	2016-01-23
5100093954	45.22	1	P_Blank	2016-01-26
5100094357	45.3	1	P_Blank	2016-02-08
5100094052	45.47	1	P_Complete	2016-02-02
5100150479	45.68	1	P_Complete	2016-02-02
5100150632	45.68	1	P_Complete	2016-02-01
6100098726	45.74	1	P_Complete	2016-02-06
2100160663	45.76	1	P_Complete	2016-02-06
5100093386	45.82	1	P_Blank	2016-01-17
5100151205	45.96	1	P_Complete	2016-02-08
5100093723	46.5	1	P_Blank	2016-01-21
5100093955	46.5	1	P_Blank	2016-01-26
5100150649	46.66	1	P_Complete	2016-01-30
5100151270	47.32	1	P_Complete	2016-02-10
6100098134	47.36	1	P_Complete	2016-01-18
2100158813	47.52	1	P_Complete	2016-01-12
6100098799	47.86	1	P_Complete	2016-02-07
5100147379	47.91	1	P_Complete	2016-04-21
5100094316	48.05	1	P_Complete	2016-02-03
6100098686	48.55	1	P_Complete	2016-02-03
5100149128	50.2	1	P_Blank	2016-01-12
6100098759	50.28	2	P_Complete	2016-02-06
5100145846	50.6	1	P_Complete	2016-04-05
5100094308	50.65	1	P_Blank	2016-02-13
2100160059	51.11	1	P_Blank	2016-01-30
5100090636	51.48	1	P_Complete	2016-03-16
5100151119	52.49	1	P_Complete	2016-02-06
6100098762	53.14	2	P_Complete	2016-02-07
5100093937	53.57	1	P_Blank	2016-01-25
6100098708	53.77	2	P_Complete	2016-02-03
5100093390	54.14	1	P_Complete	2016-01-13
5100094160	54.14	1	P_Blank	2016-02-02
5100150709	54.19	1	P_Complete	2016-02-03
5100151123	54.56	2	P_Complete	2016-02-04
5100151010	54.96	2	P_Complete	2016-02-09
5100093400	54.99	2	P Line missing	2016-01-12
5100094245	54.99	1	P_Blank	2016-02-01
5100086602	55	1	P_Complete	2016-07-24
5100094472	55.03	2	P_Complete	2016-02-07
5100147833	55.37	1	P_Complete	2016-04-30
5100138896	55.65	1	P_Complete	2016-06-19
2100160557	55.66	1	P_Complete	2016-02-03
5100093409	55.73	1	P_Blank	2016-01-16
5100151156	55.73	1	P_Complete	2016-02-09
5100094131	55.8	1	P_Blank	2016-01-30
5100151055	56.61	3	P_Complete	2016-02-08
5100150440	56.67	1	P_Complete	2016-01-26
5100094497	57.45	1	P_Complete	2016-02-07
5100150667	57.82	2	P Line missing	2016-02-03
5100150695	57.83	1	P_Blank	2016-02-01
6100098758	58.31	1	P_Complete	2016-02-12
5100149762	58.61	1	P_Complete	2016-01-23
5100145135	58.79	1	P_Complete	2016-04-20
5100141400	58.83	1	P_Complete	2016-05-16
5100151237	58.89	1	P_Complete	2016-02-07
5100150516	59.41	2	P_Complete	2016-02-02
5100151216	59.89	1	P_Complete	2016-02-09
5100145659	60	1	P_Complete	2016-04-06
5100149350	60	1	P_Blank	2016-01-25
5100094085	60.26	2	P_Blank	2016-01-30
5100151184	60.72	1	P_Complete	2016-02-10
2100160567	60.74	3	P_Complete	2016-02-07
6100097319	60.89	1	P_Complete	2016-04-26
6100098796	61.54	3	P_Complete	2016-02-06
5100143667	62.59	1	P_Complete	2016-03-30
5100093465	62.6	1	P_Complete	2016-01-17
5100151034	63.1	1	P_Complete	2016-02-09
5100089191	64.15	1	P_Complete	2016-05-18
5100089195	64.96	2	P_Complete	2016-05-19
2100160330	65.94	1	P_Complete	2016-02-01
2100160539	66.1	1	P_Complete	2016-02-03
6100098129	66.1	1	P_Blank	2016-11-11
5100092275	66.2	1	P_Blank	2016-04-21
5100150853	66.42	1	P_Blank	2016-02-02
5100151240	66.55	1	P_Complete	2016-02-07
5100151065	66.57	2	P_Blank	2016-02-07
5100150930	66.58	1	P_Complete	2016-02-09
6100096080	66.97	1	P_Complete	2016-03-15
6100098793	67.58	3	P_Complete	2016-02-07
5100092370	67.6	2	P_Complete	2016-01-15
2100160171	68.04	1	P_Blank	2016-02-03
5100151040	68.21	1	P_Complete	2016-02-10
6100098731	68.59	6	P_Complete	2016-02-09
6100076869	68.6	1	P_Complete	2016-06-04
5100148664	68.65	2	P_Complete	2016-01-19
5100094265	68.94	1	P_Blank	2016-02-07
5100149137	69	1	P_Blank	2016-01-16
6100003110	69	1	P_Complete	2016-02-01
2100155972	69.03	1	P_Complete	2016-04-08
5100151039	69.4	1	P_Complete	2016-02-10
5100151042	69.4	1	P_Complete	2016-02-10
2100160381	69.58	1	P_Complete	2016-02-02
2100160604	69.96	2	P_Complete	2016-02-06
5100150391	69.98	1	P_Complete	2016-01-30
5100150965	70.83	1	P_Complete	2016-02-04
5100151028	71.1	2	P_Complete	2016-02-04
6100098139	71.4	1	P_Blank	2016-01-18
5100142775	71.41	1	P_Complete	2016-05-27
5100092995	71.77	1	P_Blank	2016-01-09
5100091681	71.87	1	P_Complete	2016-01-06
6100097464	72.5	1	P_Complete	2016-04-29
2100160479	73.15	1	P_Blank	2016-02-04
5100149607	73.32	1	P_Blank	2016-01-18
5100147817	74.87	1	P_Complete	2016-04-28
2100160650	75.15	1	P_Complete	2016-02-07
2100149999	75.36	1	P_Blank	2016-06-13
2100157294	75.68	1	P_Blank	2016-04-25
6100085840	76.23	1	P_Complete	2016-02-02
2100160535	76.33	1	P_Complete	2016-02-08
5100148671	76.54	1	P_Complete	2016-01-09
6100098552	76.68	1	P_Blank	2016-01-30
2100158497	76.72	1	P_Complete	2016-01-09
2100158993	77.04	1	P_Blank	2016-01-16
5100150698	77.61	2	P_Complete	2016-02-01
2100158862	77.76	1	P_Complete	2016-01-16
6100090846	77.78	1	P_Blank	2016-10-28
2100160096	78.72	1	P_Complete	2016-01-30
5100093947	78.87	1	P_Complete	2016-01-25
5100090710	78.98	2	P Line missing	2016-03-22
6100098756	78.99	2	P_Complete	2016-02-07
5100146201	80	1	P_Complete	2016-04-25
5100150165	80.04	2	P Line missing	2016-01-24
5100149645	80.64	1	P_Blank	2016-01-18
6100097558	81.2	1	P_Complete	2016-01-02
5100094275	81.22	1	P_Complete	2016-02-01
5100093773	81.4	1	P_Blank	2016-01-22
5100150804	81.4	1	P_Complete	2016-02-10
5100146588	82.57	2	P_Complete	2016-04-14
5100089338	82.8	2	P Line missing	2016-05-31
5100151088	82.87	2	P_Complete	2016-02-14
5100146623	83	1	P_Blank	2016-04-14
5100093775	83.19	1	P_Complete	2016-01-22
5100094310	83.19	1	P_Complete	2016-02-06
5100094487	83.19	1	P_Blank	2016-02-10
5100094099	83.5	2	P_Complete	2016-01-29
5100142376	83.62	1	P_Complete	2016-05-31
5100150688	83.75	1	P_Complete	2016-02-02
2100160509	83.89	1	P_Complete	2016-02-08
5100094067	84.8	6	P Line missing	2016-01-26
5100094101	84.85	1	P_Complete	2016-01-29
6100096627	84.95	1	P_Complete	2016-04-05
5100150116	85.18	1	P_Complete	2016-01-25
5100151037	85.34	2	P_Complete	2016-02-10
5100149474	86.4	1	P_Complete	2016-01-17
6100094048	86.4	1	P_Complete	2016-06-10
5100094100	86.78	1	P_Complete	2016-01-30
5100151162	86.81	1	P_Complete	2016-02-09
5100094479	87.45	1	P_Complete	2016-02-13
5100150824	87.46	3	P_Complete	2016-02-02
5100151232	87.48	1	P_Complete	2016-02-08
5100093592	88.31	2	P_Blank	2016-01-18
5100151130	88.32	1	P_Complete	2016-02-07
5100094341	88.85	2	P Line missing	2016-02-02
5100094372	88.89	1	P_Blank	2016-02-03
6100098794	89.38	1	P_Complete	2016-02-10
5100150748	89.44	1	P_Complete	2016-02-01
6100079704	89.49	1	P_Complete	2016-05-17
5100151225	89.85	2	P_Complete	2016-02-09
5100151031	89.88	1	P_Complete	2016-02-10
2100156304	90.05	1	P_Complete	2016-04-13
5100093966	90.23	1	P_Blank	2016-01-25
5100093187	90.45	1	P_Complete	2016-01-15
2100160337	90.58	1	P_Complete	2016-02-08
6100098665	90.93	2	P Line missing	2016-02-02
2100160502	90.98	3	P_Complete	2016-02-03
5100149041	92.88	1	P_Complete	2016-01-19
5100094350	93	1	P_Blank	2016-02-06
5100094451	93.9	1	P_Complete	2016-02-08
2100152445	94.05	1	P_Complete	2016-02-04
5100151033	94.16	2	P_Complete	2016-02-10
6100081376	94.5	1	P_Complete	2016-03-17
5100151201	95.34	1	P_Complete	2016-02-09
2100160311	95.4	1	P_Complete	2016-02-01
2100160281	95.87	1	P_Complete	2016-02-01
6100098034	96	1	P_Complete	2016-01-17
5100094543	96.36	2	P_Complete	2016-02-10
5100093696	96.47	1	P_Blank	2016-01-19
5100094493	97.2	1	P_Complete	2016-02-07
2100155327	97.4	22	P_Complete	2016-03-29
5100150383	97.69	1	P_Blank	2016-01-29
6100086143	97.96	1	P_Complete	2016-02-04
5100094306	98.99	1	P_Complete	2016-02-03
2100160690	99	1	P_Complete	2016-02-10
5100093822	99.13	2	P_Blank	2016-01-25
2100158054	100	1	P_Complete	2016-01-30
6100098430	100.8	1	P_Blank	2016-01-26
5100150963	101.33	2	P Line missing	2016-02-07
5100093537	101.76	1	P_Blank	2016-01-16
5100150720	102.36	1	P_Complete	2016-02-03
5100148066	102.38	2	P_Complete	2016-01-05
5100151150	102.64	1	P_Blank	2016-02-07
2100020799	103.74	1	P_Complete	2016-07-20
5100151126	103.81	1	P_Complete	2016-02-23
5100146304	103.87	1	P_Complete	2016-04-12
6100096345	103.9	2	P Line missing	2016-03-23
2100021399	104.6	2	P_Complete	2016-01-23
5100094317	104.9	1	P_Complete	2016-02-09
2100157538	104.91	1	P_Complete	2016-04-28
6100094050	104.94	1	P_Complete	2016-06-10
5100094219	105.19	1	P_Blank	2016-02-01
6100097691	105.4	7	P_Complete	2016-01-09
5100094494	105.98	1	P_Complete	2016-02-10
5100145570	106.27	1	P_Complete	2016-04-20
2100020727	106.59	2	P_Blank	2016-12-16
5100150064	106.68	1	P_Blank	2016-01-22
2100160375	106.77	1	P_Complete	2016-08-02
6100097811	107.1	1	P_Blank	2016-01-09
5100092932	107.19	1	P_Blank	2016-01-04
5100094480	107.86	2	P_Complete	2016-02-07
5100094520	107.91	1	P_Complete	2016-02-08
6100091619	108	2	P_Complete	2016-11-17
6100092277	108.24	1	P_Complete	2016-12-30
5100093792	108.28	1	P_Complete	2016-01-23
5100094483	108.31	1	P_Complete	2016-02-08
5100148269	109.44	1	P_Complete	2016-01-04
5100151249	110.58	2	P_Complete	2016-02-09
5100094190	111.09	2	P_Complete	2016-01-30
5100148139	111.31	1	P_Complete	2016-01-02
6100097605	111.62	1	P_Complete	2016-01-03
6100096131	112.47	5	P_Complete	2016-04-22
2100159650	112.79	1	P_Blank	2016-01-23
5100091973	113.06	1	P_Complete	2016-04-15
2100160039	113.4	1	P_Complete	2016-01-29
5100094524	113.4	1	P_Blank	2016-02-07
5100094386	114.32	1	P_Complete	2016-02-09
5100093279	115.2	1	P_Blank	2016-01-12
5100150050	115.2	1	P_Complete	2016-01-23
5100151073	115.65	1	P_Blank	2016-02-15
5100150540	115.67	1	P_Blank	2016-01-29
5100094259	116.23	1	P_Complete	2016-02-02
5100148017	116.28	1	P_Complete	2016-01-05
5100151090	116.46	1	P_Complete	2016-02-10
6100098770	118.32	1	P_Complete	2016-02-07
2100160511	118.54	2	P_Complete	2016-02-08
6100086041	118.6	1	P_Complete	2016-02-04
5100150041	118.65	1	P_Complete	2016-01-22
5100093329	118.92	1	P_Blank	2016-01-13
5100091401	119.26	1	P_Complete	2016-04-04
5100150304	119.79	1	P_Complete	2016-01-25
2100160659	119.84	1	P_Complete	2016-02-08
5100151190	119.84	1	P_Complete	2016-02-10
2100154332	120.12	1	P_Blank	2016-03-28
5100151227	120.59	10	P_Complete	2016-02-07
5100150904	120.6	1	P_Complete	2016-02-02
5100151145	121.72	2	P_Complete	2016-02-07
6100098784	121.78	3	P InComplete	2016-02-06
2100157503	121.8	1	P_Complete	2016-04-27
5100151174	121.97	1	P_Complete	2016-02-10
6100095506	122.71	1	P_Complete	2016-05-25
6100098704	123.3	3	P Line missing	2016-02-03
5100151254	123.65	1	P_Blank	2016-02-09
5100093635	123.79	1	P_Blank	2016-01-19
5100093751	123.85	2	P Line missing	2016-01-19
6100096913	123.9	1	P_Complete	2016-04-13
6100093780	124.97	1	P_Blank	2016-06-05
5100091913	126.39	1	P_Blank	2016-04-13
5100093745	127.2	1	P_Blank	2016-01-19
5100149007	127.2	1	P_Complete	2016-01-11
5100088017	127.46	1	P_Complete	2016-05-20
6100088570	127.65	1	P_Blank	2016-09-04
6100094872	127.65	1	P_Complete	2016-05-05
5100149450	128.4	12	P_Complete	2016-01-18
2100021353	129.47	1	P_Complete	2016-04-30
2100021113	129.52	1	P_Complete	2016-05-25
6100096710	129.6	1	P_Complete	2016-04-06
5100150243	129.65	1	P_Blank	2016-01-26
6100098749	130.46	1	P_Complete	2016-02-07
2100158920	131.15	1	P_Blank	2016-01-17
6100098505	132.2	1	P_Blank	2016-01-26
5100094059	132.33	1	P_Complete	2016-01-29
5100149046	133.1	1	P_Blank	2016-01-18
5100151060	134	2	P_Complete	2016-02-04
5100150411	134.06	1	P_Complete	2016-01-26
5100151108	134.37	1	P_Blank	2016-02-07
5100092197	134.46	1	P_Complete	2016-04-30
5100150917	134.6	3	P_Complete	2016-02-03
5100150935	134.77	1	P_Complete	2016-02-09
5100093805	135.67	1	P_Blank	2016-01-23
2100160687	135.88	1	P_Complete	2016-02-07
5100151100	137.32	4	P_Complete	2016-02-07
5100092909	137.88	1	P_Blank	2016-01-06
5100150889	138.12	2	P_Complete	2016-02-02
2100021506	138.56	1	P_Blank	2016-02-02
5100151094	138.8	1	P_Blank	2016-02-04
5100149903	139.5	2	P_Complete	2016-01-23
5100150293	139.97	1	P_Complete	2016-02-03
5100150936	139.98	1	P_Complete	2016-02-03
6100094452	141.12	1	P_Complete	2016-06-23
5100094368	141.15	1	P_Complete	2016-02-03
2100160114	142.44	1	P_Complete	2016-01-30
5100150840	143.07	1	P_Complete	2016-02-09
2100160368	143.82	2	P Line missing	2016-02-01
5100149806	144	1	P_Complete	2016-01-19
5100150786	144	1	P_Blank	2016-01-30
5100151152	144	1	P_Blank	2016-02-07
6100098363	144	2	P_Complete	2016-01-24
2100159804	144.1	1	P_Blank	2016-01-25
2100019848	144.14	1	P_Complete	2016-01-02
6100097913	144.36	1	P_Complete	2016-01-10
2100160030	144.58	1	P_Blank	2016-02-01
2100160629	144.58	1	P_Blank	2016-02-28
5100150374	144.78	1	P_Blank	2016-01-26
2100159973	145.2	1	P_Blank	2016-01-26
2100160177	145.25	1	P_Blank	2016-02-01
5100094396	145.75	1	P_Complete	2016-02-03
5100151209	146.54	5	P_Complete	2016-02-07
5100089403	146.63	2	P_Complete	2016-05-22
5100143206	146.64	3	P InComplete	2016-03-30
5100094464	147.11	2	P_Complete	2016-02-07
2100152340	147.69	1	P_Blank	2016-05-16
6100098412	149.1	1	P_Blank	2016-01-24
5100090382	149.7	1	P_Complete	2016-03-30
6100098489	150.14	2	P_Complete	2016-01-26
5100151196	150.25	1	P_Complete	2016-02-09
2100155303	150.4	12	P_Complete	2016-03-28
6100097298	150.57	1	P_Complete	2016-04-26
5100094535	151.05	1	P_Complete	2016-02-13
2100147945	151.19	2	P Line missing	2016-07-25
6100098580	151.6	3	P_Complete	2016-02-07
5100094347	152.27	2	P_Complete	2016-02-07
6100098789	153	2	P_Complete	2016-02-06
5100142788	154	1	P_Complete	2016-03-02
2100160548	155.79	1	P_Complete	2016-02-04
5100151003	155.82	1	P_Complete	2016-02-07
5100094522	156.5	1	P_Complete	2016-02-08
5100094529	156.5	1	P_Complete	2016-02-28
6100098775	157.63	3	P Line missing	2016-02-07
6100098624	157.78	2	P_Blank	2016-02-09
5100091916	158.68	1	P_Blank	2016-04-14
5100150076	159.13	1	P_Complete	2016-01-30
5100151121	159.13	1	P_Blank	2016-02-04
6100098239	161.94	1	P_Blank	2016-01-19
6100094372	162	1	P_Complete	2016-06-18
6100094638	162	1	P_Complete	2016-06-26
2100160444	162.28	2	P_Complete	2016-02-02
5100151151	162.29	4	P_Complete	2016-02-07
5100093689	162.4	2	P_Complete	2016-01-18
5100150733	162.81	1	P_Complete	2016-02-02
2100160161	165.7	1	P_Blank	2016-01-30
6100098386	165.79	2	P_Complete	2016-01-25
2100021387	167.6	1	P_Blank	2016-04-27
5100151199	167.73	1	P_Complete	2016-02-09
5100094157	167.99	2	P_Blank	2016-01-30
6100093498	168.29	1	P_Complete	2016-07-23
6100097876	169.13	1	P_Complete	2016-01-11
5100150464	169.2	2	P_Complete	2016-01-29
2100155298	169.6	12	P_Complete	2016-03-28
5100093938	170	1	P_Complete	2016-01-24
5100094153	170.7	1	P_Complete	2016-02-02
5100093782	170.81	2	P Line missing	2016-01-22
5100093129	170.9	3	P_Complete	2016-01-10
5100093781	171.37	1	P_Blank	2016-01-30
2100159831	171.68	1	P_Blank	2016-01-24
5100150102	172.8	1	P_Complete	2016-01-23
5100150164	173.5	1	P_Blank	2016-01-25
5100151157	173.5	1	P_Blank	2016-02-07
6100097880	174.64	4	P_Complete	2016-01-10
6100098705	174.64	6	P_Complete	2016-02-03
2100160662	175.08	3	P_Complete	2016-02-06
5100094178	175.5	1	P_Blank	2016-02-01
6100079881	176	1	P_Complete	2016-05-26
5100148401	176.11	1	P_Complete	2016-01-25
6100097860	176.9	1	P_Complete	2016-01-10
5100150339	177.69	1	P_Complete	2016-02-02
5100093373	178.45	1	P_Complete	2016-01-18
5100093859	178.45	1	P_Complete	2016-01-25
2100158379	179.34	1	P_Complete	2016-01-09
5100150229	180.31	1	P_Blank	2016-02-01
5100151247	180.5	2	P_Complete	2016-02-09
2100160591	181.12	3	P_Complete	2016-02-07
5100150503	181.12	1	P_Complete	2016-01-29
5100149967	181.44	1	P_Complete	2016-01-23
5100094370	182.46	2	P_Complete	2016-02-03
5100147863	182.86	4	P_Complete	2016-01-03
2100158824	182.95	1	P_Blank	2016-01-13
5100094528	183.62	4	P Line missing	2016-02-07
5100150044	183.8	1	P_Blank	2016-01-25
5100140644	183.9	2	P_Complete	2016-05-30
5100150779	184.28	1	P_Complete	2016-02-01
5100148359	185.31	1	P_Blank	2016-01-04
5100088772	185.98	1	P_Complete	2016-05-11
2100160113	186.6	1	P_Complete	2016-01-29
6100098781	187.44	2	P_Blank	2016-02-07
5100094231	187.68	4	P InComplete	2016-02-03
5100151223	188.66	1	P_Complete	2016-02-09
5100151159	189.3	1	P_Complete	2016-02-09
6100098185	189.42	1	P_Complete	2016-01-18
5100093344	189.6	1	P_Blank	2016-01-13
5100094349	191.52	2	P_Complete	2016-02-07
5100093399	191.88	1	P_Complete	2016-01-12
2100160507	194.5	2	P_Complete	2016-02-08
5100151030	194.98	2	P_Complete	2016-02-09
2100160176	195.84	1	P_Complete	2016-01-30
6100098742	196	1	P_Complete	2016-02-08
5100142305	196.22	1	P_Complete	2016-05-26
5100103479	197.1	1	P_Complete	2016-01-01
6100098745	197.64	2	P_Complete	2016-02-16
5100150928	197.94	1	P_Blank	2016-02-03
5100093694	198	12	P_Complete	2016-01-18
2100021496	198.35	2	P_Complete	2016-01-29
5100094496	199.17	4	P Line missing	2016-02-10
5100094081	199.28	3	P Line missing	2016-01-27
2100160580	199.91	1	P_Complete	2016-02-09
6100090435	200.33	1	P_Complete	2016-10-24
5100088072	200.88	2	P_Complete	2016-06-25
5100149662	201.92	1	P_Blank	2016-01-18
2100160585	204.08	2	P_Complete	2016-02-06
6100096448	204.48	1	P_Complete	2016-04-22
6100098788	204.52	1	P_Complete	2016-02-07
2100160263	205.06	1	P_Blank	2016-02-06
5100151238	207.36	1	P_Complete	2016-02-08
6100097087	207.9	1	P_Complete	2016-04-19
5100149127	208.27	1	P_Blank	2016-01-16
5100093358	208.72	2	P_Complete	2016-01-18
5100151161	210.37	2	P Line missing	2016-02-07
2100160503	210.46	3	P Line missing	2016-02-03
5100147753	210.74	1	P_Complete	2016-04-27
5100094152	210.92	2	P_Complete	2016-02-01
5100149411	211.57	1	P_Complete	2016-01-18
5100150259	211.79	3	P_Complete	2016-02-02
5100150542	212.26	2	P Line missing	2016-01-30
5100094292	212.72	2	P Line missing	2016-02-02
5100088549	212.75	1	P_Complete	2016-05-10
5100093976	213.35	1	P_Blank	2016-01-25
5100094437	213.35	1	P_Blank	2016-02-04
5100142776	213.35	1	P_Complete	2016-03-02
6100078926	213.46	1	P_Complete	2016-05-10
2100157512	213.84	1	P_Blank	2016-04-28
2100160430	214.13	1	P_Complete	2016-02-08
2100158986	214.19	2	P_Blank	2016-01-16
6100098424	214.2	1	P_Complete	2016-01-26
5100149972	214.38	1	P_Complete	2016-01-23
5100081613	214.7	2	P_Complete	2016-10-07
5100151163	215.04	1	P_Complete	2016-02-09
2100157251	216	1	P_Complete	2016-01-26
2100158236	216.18	6	P_Complete	2016-01-08
6100098192	216.74	3	P_Complete	2016-02-01
5100094430	217.86	2	P_Complete	2016-02-07
6100098778	218.33	3	P_Complete	2016-02-06
5100094395	218.8	8	P_Complete	2016-02-05
5100091482	219.6	1	P_Complete	2016-04-05
5100150271	220.63	3	P_Blank	2016-01-25
5100091990	221.03	2	P_Complete	2016-04-20
2100160373	221.16	1	P_Complete	2016-02-03
5100094228	221.66	3	P_Complete	2016-02-02
6100098792	221.7	2	P_Complete	2016-02-13
5100151173	221.93	1	P_Complete	2016-02-10
6100098655	221.93	1	P_Complete	2016-02-08
5100149559	222.16	4	P InComplete	2016-01-30
5100149724	222.7	1	P_Blank	2016-01-19
6100098768	223.28	3	P_Complete	2016-02-06
5100142309	224.4	1	P_Complete	2016-05-30
5100094495	224.6	2	P_Complete	2016-02-07
6100003014	225.7	1	P_Complete	2016-06-07
5100150712	226.33	2	P_Complete	2016-02-03
5100149928	226.4	2	P_Complete	2016-01-22
5100091029	229.89	5	P_Complete	2016-03-24
5100146579	230.4	2	P_Complete	2016-04-12
5100092970	231.78	1	P_Complete	2016-01-05
2100159904	232.6	3	P InComplete	2016-01-26
5100093343	232.67	1	P_Blank	2016-01-16
5100093298	235.02	2	P_Complete	2016-01-12
5100148617	235.1	1	P_Complete	2016-01-06
5100147657	236.26	1	P_Complete	2016-01-26
5100093762	236.49	3	P Line missing	2016-01-19
5100151233	236.5	2	P Line missing	2016-02-10
5100150822	236.92	1	P_Complete	2016-02-02
5100093649	237.56	1	P_Blank	2016-01-18
5100151158	239.38	1	P_Complete	2016-02-07
2100159348	239.85	1	P_Complete	2016-01-23
5100150677	240.39	3	P_Complete	2016-02-01
5100150445	240.41	1	P_Complete	2016-01-27
5100150616	240.41	1	P_Blank	2016-02-04
5100094425	241.04	3	P_Complete	2016-02-07
5100094518	241.08	2	P_Complete	2016-02-07
5100151246	241.12	2	P_Complete	2016-02-10
5100150846	241.81	2	P_Complete	2016-02-03
2100155307	242.8	20	P_Complete	2016-03-28
5100148995	244.52	1	P_Complete	2016-01-30
5100151096	244.72	2	P Line missing	2016-02-04
5100148099	246	1	P_Blank	2016-04-30
5100150743	246.59	2	P Line missing	2016-02-01
5100094300	246.9	3	P_Complete	2016-02-02
5100150979	247.9	2	P_Complete	2016-02-09
5100150263	249	1	P_Blank	2016-01-24
6100090094	249.39	1	P_Complete	2016-10-10
5100151000	249.85	2	P Line missing	2016-02-04
2100160188	249.97	1	P_Complete	2016-01-30
5100094385	251.29	1	P_Complete	2016-02-09
5100148106	252.4	1	P_Blank	2016-01-01
6100098713	252.68	2	P_Complete	2016-02-03
2100160320	253.01	1	P_Blank	2016-02-02
5100150431	254.09	2	P_Blank	2016-01-29
2100154294	254.12	1	P_Blank	2016-03-15
5100150971	254.28	2	P_Complete	2016-02-09
5100149722	254.71	1	P_Blank	2016-01-25
2100160676	254.98	1	P_Complete	2016-02-06
5100094249	255.89	1	P_Blank	2016-02-02
2100020900	255.9	1	P_Complete	2016-06-27
5100094376	256.05	1	P_Complete	2016-02-07
5100094508	256.25	4	P_Complete	2016-02-07
6100097917	256.86	1	P_Complete	2016-01-10
5100147933	257.69	1	P_Complete	2016-04-30
2100160473	259.4	3	P_Complete	2016-02-03
6100096038	263.55	2	P_Complete	2016-03-15
5100092571	264.13	2	P Line missing	2016-01-30
2100160673	264.3	1	P_Complete	2016-02-06
5100150474	264.9	2	P_Blank	2016-01-27
5100094399	264.96	1	P_Complete	2016-02-07
6100082172	265.07	1	P_Complete	2016-03-29
5100150909	265.33	3	P_Complete	2016-02-02
5100148987	265.51	4	P Line missing	2016-01-12
6100098570	267.32	3	P Line missing	2016-02-01
5100092375	268.51	2	P_Complete	2016-04-22
5100138825	271.03	1	P_Complete	2016-06-15
5100138622	271.72	1	P_Complete	2016-06-10
5100151168	272.47	3	P_Complete	2016-02-07
5100150969	273.88	3	P_Complete	2016-02-09
5100093767	275.12	3	P Line missing	2016-01-30
5100146367	275.23	3	P_Complete	2016-04-30
5100146154	276.45	1	P_Complete	2016-04-08
6100002959	277.2	1	P_Complete	2016-11-19
2100158535	278.57	9	P_Complete	2016-01-10
5100094476	281.85	4	P_Complete	2016-02-13
5100150874	282	1	P_Blank	2016-02-02
5100094263	282.62	1	P_Blank	2016-02-03
5100094523	282.62	1	P_Complete	2016-02-08
5100151248	282.62	1	P_Complete	2016-02-09
5100149694	283.01	1	P_Complete	2016-01-18
6100094848	283.48	4	P_Complete	2016-05-05
6100095196	284.13	1	P_Complete	2016-05-16
5100094094	285.7	1	P_Blank	2016-02-20
2100159629	285.79	1	P_Blank	2016-01-23
2100160361	286.2	1	P_Blank	2016-02-01
5100150745	286.63	2	P_Complete	2016-02-03
6100097940	286.76	3	P_Complete	2016-01-18
5100151281	286.94	5	P_Complete	2016-02-07
2100160565	287.37	1	P_Complete	2016-02-07
2100158878	288	1	P_Complete	2016-01-13
6100098326	288.08	1	P_Complete	2016-01-23
5100148940	289.27	1	P_Complete	2016-01-09
2100156985	290.2	5	P_Complete	2016-01-15
5100093288	290.32	3	P_Complete	2016-01-12
6100094347	290.62	1	P_Complete	2016-06-18
2100139812	292.92	16	P InComplete	2016-12-31
5100147548	293.83	1	P_Complete	2016-04-26
6100086118	294.5	1	P_Complete	2016-02-07
2100020794	295.24	2	P_Complete	2016-07-15
2100160658	295.45	4	P Line missing	2016-02-08
6100098783	296.46	1	P_Complete	2016-02-07
5100151043	297.01	4	P Line missing	2016-02-04
2100160136	298.16	2	P_Blank	2016-02-02
5100151116	298.72	1	P_Complete	2016-02-06
5100090550	298.99	1	P_Complete	2016-03-16
5100094500	299.4	1	P_Complete	2016-02-09
5100149343	300.51	1	P_Blank	2016-01-16
5100151019	302.8	2	P_Complete	2016-02-10
2100158001	302.94	1	P_Blank	2016-01-04
5100147493	304.72	2	P Line missing	2016-04-23
5100091733	304.92	1	P_Complete	2016-04-12
5100150879	305.59	1	P_Complete	2016-02-02
5100151143	305.86	3	P_Complete	2016-02-08
2100160342	306.56	4	P_Complete	2016-02-01
6100095649	306.74	2	P_Complete	2016-05-30
2100021514	307.44	1	P_Blank	2016-02-03
5100149676	307.44	1	P_Complete	2016-01-18
5100094426	308.72	3	P_Complete	2016-02-07
2100160555	309.18	2	P Line missing	2016-02-03
6100084372	311.1	1	P_Complete	2016-01-05
5100150852	311.15	2	P_Complete	2016-02-03
5100090273	311.74	2	P_Complete	2016-03-08
5100151219	312.02	5	P Line missing	2016-02-07
5100150495	312.18	3	P_Complete	2016-01-29
5100147108	312.83	3	P Line missing	2016-04-22
5100094539	312.95	1	P_Complete	2016-02-08
2100160231	313.05	3	P Line missing	2016-01-30
5100151239	313.31	4	P_Complete	2016-02-09
5100094435	316.04	4	P Line missing	2016-02-07
2100160610	316.24	1	P_Complete	2016-02-06
6100098720	317.49	1	P_Complete	2016-02-06
2100160277	317.96	1	P_Complete	2016-02-02
6100094094	317.96	1	P_Complete	2016-06-11
6100091180	319.93	1	P_Complete	2016-11-05
2100160534	320	1	P_Complete	2016-02-04
2100159005	321.28	2	P Line missing	2016-01-17
2100159003	321.29	1	P_Blank	2016-01-16
2100147253	321.42	2	P_Complete	2016-07-31
5100150031	321.75	4	P_Complete	2016-01-23
5100093433	322.35	2	P Line missing	2016-01-13
5100086134	323.03	4	P_Complete	2016-07-16
5100147674	323.64	1	P_Complete	2016-04-27
6100098782	324.93	3	P_Complete	2016-02-06
5100151175	326	3	P_Complete	2016-02-10
5100151045	326.29	2	P_Complete	2016-02-06
6100094767	326.4	1	P_Complete	2016-05-04
5100094503	329.64	6	P Line missing	2016-02-07
5100150090	334.06	1	P_Complete	2016-01-23
6100093268	334.2	1	P_Blank	2016-07-16
5100092221	335.05	1	P_Blank	2016-04-20
5100092398	335.05	1	P_Blank	2016-04-22
6100098166	336	1	P_Complete	2016-01-18
5100093294	336.61	4	P_Complete	2016-01-12
5100091044	339.7	1	P_Blank	2016-03-29
5100148768	340	1	P_Complete	2016-01-12
6100096285	340.4	1	P_Complete	2016-03-22
5100148812	341.01	5	P_Complete	2016-01-09
2100158211	341.81	1	P_Blank	2016-01-05
2100159919	342	1	P_Blank	2016-02-03
5100093160	342	1	P_Complete	2016-01-18
6100089404	345.02	1	P_Complete	2016-10-01
6100098765	345.2	4	P Line missing	2016-02-07
5100150858	347	1	P_Blank	2016-02-06
5100150952	347.32	2	P Line missing	2016-02-03
5100094521	348.7	1	P_Complete	2016-02-08
5100151117	350.77	3	P Line missing	2016-02-05
5100148730	351.82	2	P_Complete	2016-01-10
5100150999	352	2	P_Complete	2016-02-08
5100094232	354.47	1	P_Blank	2016-02-02
5100150627	355.59	1	P_Blank	2016-02-01
5100141041	356.4	1	P_Complete	2016-05-15
5100150887	361.05	1	P_Complete	2016-02-02
5100150885	363.46	3	P_Complete	2016-02-02
5100147417	364.65	2	P_Complete	2016-04-30
5100150120	367.53	2	P_Complete	2016-01-25
2100151495	368.41	1	P_Blank	2016-05-04
5100094473	368.48	5	P Line missing	2016-02-08
5100148918	368.64	1	P_Complete	2016-01-10
5100151171	369.32	3	P_Complete	2016-02-10
5100094443	370.15	7	P Line missing	2016-02-04
2100151673	370.7	2	P_Complete	2016-03-14
5100151272	370.94	1	P_Complete	2016-02-08
6100089942	372.1	2	P_Complete	2016-10-07
6100098653	372.91	2	P Line missing	2016-02-03
2100159584	373.36	5	P Line missing	2016-01-22
5100093615	373.69	3	P_Complete	2016-01-19
5100150942	375.3	4	P_Complete	2016-02-03
5100094499	376.97	2	P_Complete	2016-02-07
5100151176	377.32	4	P_Complete	2016-02-10
5100151109	377.61	5	P_Complete	2016-02-09
2100159763	379.04	5	P_Complete	2016-01-25
2100160156	380.17	2	P_Complete	2016-01-30
6100093047	380.86	1	P_Complete	2016-07-08
6100098213	380.96	1	P_Blank	2016-01-30
5100150227	383.21	1	P_Blank	2016-01-25
5100094027	383.92	3	P_Complete	2016-01-26
5100151095	384.07	1	P_Complete	2016-02-10
5100094417	384.92	5	P_Complete	2016-02-04
5100150454	386.47	2	P_Complete	2016-01-30
6100086850	386.78	1	P_Complete	2016-02-17
5100094486	386.85	3	P_Complete	2016-02-10
6100095982	387.66	1	P_Complete	2016-03-08
2100159995	387.9	1	P_Complete	2016-01-26
5100151198	387.95	1	P_Complete	2016-02-09
5100094507	389.07	5	P Line missing	2016-02-07
5100151260	389.54	5	P InComplete	2016-02-07
5100093579	390.8	3	P_Complete	2016-01-30
5100150453	391.31	2	P_Complete	2016-02-02
2100159544	394.92	2	P Line missing	2016-01-22
5100087165	396	1	P_Complete	2016-06-10
2100160636	396.77	3	P Line missing	2016-02-07
2100153889	397.53	1	P_Complete	2016-03-20
5100094459	398.16	8	P Line missing	2016-02-07
5100094532	398.3	1	P_Blank	2016-02-13
5100094159	399.69	5	P Line missing	2016-01-30
5100150754	403.2	2	P Line missing	2016-02-02
5100151149	403.2	1	P_Blank	2016-02-07
6100097032	403.2	1	P_Complete	2016-04-15
5100145860	403.81	2	P_Complete	2016-04-29
5100094086	404.77	3	P Line missing	2016-01-27
2100159354	404.92	10	P InComplete	2016-01-20
5100142842	406.08	1	P_Complete	2016-05-31
5100143389	406.26	1	P_Complete	2016-03-10
5100151224	408.98	2	P_Complete	2016-02-09
5100090714	409.63	7	P_Complete	2016-04-20
5100091664	412.02	1	P_Complete	2016-04-07
6100098513	412.98	7	P InComplete	2016-02-28
5100094511	414.8	1	P_Complete	2016-02-08
6100088420	416.29	1	P_Complete	2016-09-01
5100150001	418.47	4	P Line missing	2016-01-26
5100089254	422.28	1	P_Complete	2016-03-08
5100146856	424.02	1	P_Complete	2016-04-18
5100150881	424.9	1	P_Complete	2016-02-03
6100080485	425.15	1	P_Complete	2016-03-04
5100151008	425.87	5	P_Complete	2016-02-09
5100150484	426.4	1	P_Complete	2016-01-29
2100154316	426.68	10	P Line missing	2016-03-17
5100149492	426.81	2	P Line missing	2016-01-18
5100151274	427.44	3	P Line missing	2016-02-10
5100147867	427.72	7	P_Complete	2016-01-29
5100151268	429.38	2	P_Complete	2016-02-10
5100094271	429.66	1	P_Complete	2016-02-01
5100151210	431.46	2	P Line missing	2016-02-07
5100149899	432	1	P_Complete	2016-01-23
5100094104	432.25	4	P_Complete	2016-01-29
5100141115	432.79	1	P_Complete	2016-05-15
5100138952	432.93	1	P_Complete	2016-06-14
5100085177	434.7	1	P_Complete	2016-12-17
5100151277	434.7	1	P_Complete	2016-02-19
2100160520	434.74	3	P_Complete	2016-02-04
5100150775	434.91	1	P_Complete	2016-02-03
5100149915	437.77	3	P_Complete	2016-01-22
2100147752	437.93	1	P_Complete	2016-07-31
5100151284	438	1	P_Complete	2016-02-08
5100151004	439.98	3	P_Complete	2016-02-07
5100146959	440.16	1	P_Complete	2016-04-20
5100144581	440.36	6	P_Complete	2016-03-24
6100098651	440.61	4	P_Complete	2016-02-17
2100160624	440.82	2	P Line missing	2016-02-28
6100080032	442.16	1	P_Complete	2016-05-27
5100148596	442.49	4	P_Complete	2016-01-11
5100093984	443.52	2	P_Complete	2016-01-25
6100098025	444.37	2	P_Complete	2016-08-27
5100151115	446.32	3	P_Complete	2016-02-06
5100093977	450	1	P_Complete	2016-01-26
5100094398	450.12	1	P_Complete	2016-02-07
5100150592	450.45	3	P_Complete	2016-01-30
5100094257	452.42	2	P_Complete	2016-02-06
5100149704	452.8	1	P_Blank	2016-01-18
5100093589	453.92	1	P_Complete	2016-01-18
5100150847	454.45	3	P Line missing	2016-02-09
5100146686	456.96	1	P_Complete	2016-04-15
6100092454	459.05	1	P_Complete	2016-12-10
5100151107	459.45	4	P_Complete	2016-02-04
5100094344	459.54	1	P_Blank	2016-02-06
2100160670	460.2	2	P_Complete	2016-02-06
5100092676	460.68	1	P_Complete	2016-04-29
5100151017	460.8	1	P_Complete	2016-02-10
5100094272	460.89	1	P_Complete	2016-02-01
6100093462	461.5	1	P_Complete	2016-07-22
5100150758	462.67	1	P_Blank	2016-02-02
2100160686	464.28	5	P InComplete	2016-02-07
5100151080	464.46	2	P_Blank	2016-02-04
5100150773	464.62	2	P Line missing	2016-02-02
5100092915	470.42	1	P_Blank	2016-01-05
5100147523	470.99	5	P_Complete	2016-04-23
5100094320	471.96	1	P_Blank	2016-02-02
5100150752	472.26	5	P_Complete	2016-12-01
2100155191	473.66	14	P_Complete	2016-04-15
6100098777	474.74	2	P_Complete	2016-02-28
5100139522	477.48	1	P_Complete	2016-05-20
5100094164	481.14	1	P_Blank	2016-01-30
5100149386	481.37	2	P_Complete	2016-01-17
5100151228	482.35	1	P_Blank	2016-02-07
5100147368	485.77	2	P_Complete	2016-04-20
5100094482	486.14	2	P_Complete	2016-02-14
5100094076	486.64	1	P_Complete	2016-02-02
5100151001	487.36	1	P_Complete	2016-02-08
5100148424	488.4	1	P_Blank	2016-01-10
6100098208	488.47	6	P_Complete	2016-01-19
5100134367	488.8	1	P_Complete	2016-12-12
5100144305	489.09	2	P_Complete	2016-03-16
5100092080	494	1	P_Complete	2016-04-15
5100092947	494.38	5	P_Complete	2016-01-04
2100160501	494.81	5	P Line missing	2016-02-04
5100151263	495.57	6	P InComplete	2016-02-09
5100150562	496.8	1	P_Blank	2016-01-30
6100098223	500.2	1	P_Complete	2016-01-19
5100150352	501.12	1	P_Blank	2016-01-26
2100160309	501.81	1	P_Blank	2016-08-01
5100142755	503.46	1	P_Complete	2016-05-31
5100089769	503.75	6	P_Complete	2016-05-30
5100094114	503.81	1	P_Complete	2016-02-01
5100148126	504.22	2	P_Complete	2016-04-30
5100150452	506	4	P Line missing	2016-02-03
6100097844	507.38	1	P_Complete	2016-01-17
5100094526	507.77	1	P_Complete	2016-02-09
5100150643	509.33	6	P Line missing	2016-02-07
2100160367	509.97	3	P Line missing	2016-02-01
5100143398	511.1	1	P_Complete	2016-03-10
5100134795	511.17	1	P_Complete	2016-01-15
2100158851	512.94	4	P_Complete	2016-01-15
6100095134	514.85	2	P_Complete	2016-05-13
5100094512	515.08	1	P_Complete	2016-02-09
5100094371	515.47	6	P Line missing	2016-02-03
5100150436	517.1	1	P_Complete	2016-01-26
5100094303	518.5	1	P_Complete	2016-02-03
5100150960	518.79	5	P_Complete	2016-02-03
2100158971	520.8	1	P_Complete	2016-01-15
5100150564	521	1	P_Blank	2016-01-30
5100147956	522.39	5	P_Complete	2016-04-30
5100094485	522.72	1	P_Complete	2016-02-08
5100149826	523.48	1	P_Complete	2016-01-19
5100150778	524.67	4	P Line missing	2016-02-01
5100149908	524.7	1	P_Complete	2016-01-23
5100151250	527.09	9	P_Complete	2016-02-07
5100087403	527.12	1	P_Complete	2016-06-16
5100093052	527.51	2	P_Complete	2016-01-09
6100096760	530.36	3	P_Complete	2016-04-08
5100151221	530.37	4	P Line missing	2016-02-07
5100091061	532.21	1	P_Complete	2016-03-30
5100151097	532.79	1	P_Complete	2016-02-07
5100148357	532.8	1	P_Complete	2016-01-06
5100094287	534.24	1	P_Complete	2016-02-01
2100153192	534.888	2	P_Complete	2016-04-15
5100150742	536.25	2	P Line missing	2016-02-03
5100091630	536.66	1	P_Complete	2016-04-07
5100091251	538.2	1	P_Complete	2016-04-04
5100150149	538.38	1	P_Complete	2016-01-30
5100092144	540.56	1	P_Complete	2016-04-25
2100159615	541.39	1	P_Blank	2016-01-22
6100096592	541.4	2	P_Complete	2016-04-04
2100151747	542.21	11	P_Complete	2016-05-09
5100094049	542.3	2	P_Complete	2016-01-30
6100098433	549.15	1	P_Complete	2016-01-25
5100094403	549.99	3	P_Complete	2016-02-07
6100098365	550.93	3	P Line missing	2016-01-24
5100093692	552.32	1	P_Complete	2016-01-19
5100150725	552.57	1	P_Complete	2016-02-02
5100151023	556.5	1	P_Complete	2016-02-10
5100094120	558.45	3	P InComplete	2016-02-02
5100150198	558.87	4	P_Complete	2016-02-16
5100094369	559.22	6	P Line missing	2016-02-03
5100146776	559.5	1	P_Complete	2016-04-20
5100149947	560.8	1	P_Blank	2016-01-25
5100148026	564.68	1	P_Blank	2016-01-02
5100151182	565.23	5	P_Complete	2016-02-07
5100149701	566.68	7	P_Complete	2016-01-25
6100080011	568.62	1	P_Complete	2016-05-28
2100154887	569.8	2	P_Complete	2016-03-30
5100151215	570.44	1	P_Complete	2016-02-09
5100144700	572.78	1	P_Complete	2016-03-28
5100146851	573.35	2	P_Complete	2016-04-30
5100093933	576	1	P_Complete	2016-01-25
5100094504	576.1	4	P_Complete	2016-02-07
2100159457	576.3	1	P_Blank	2016-01-22
5100145985	576.99	1	P_Complete	2016-04-07
2100159351	578.91	1	P_Complete	2016-01-24
6100098725	579.82	4	P_Complete	2016-02-06
2100160110	580.2	3	P_Complete	2016-01-29
5100149173	581.72	1	P_Blank	2016-01-18
5100149175	581.72	1	P_Blank	2016-01-18
5100145212	582.92	1	P_Complete	2016-04-30
2100160445	582.94	4	P_Complete	2016-02-02
5100090310	583.78	1	P_Complete	2016-03-14
5100091514	583.78	1	P_Blank	2016-04-06
5100147663	583.91	2	P_Complete	2016-04-26
5100148726	586.84	2	P_Complete	2016-01-12
5100150922	590.21	6	P Line missing	2016-02-03
5100151172	591.17	4	P_Complete	2016-02-10
5100151207	592.39	2	P_Complete	2016-02-07
5100087885	595.2	1	P_Complete	2016-06-28
5100093988	595.35	1	P_Complete	2016-01-25
5100090169	597	3	P_Complete	2016-03-15
5100151105	598.46	1	P_Complete	2016-02-04
5100149961	600.53	1	P_Complete	2016-01-25
5100148525	603.2	2	P_Blank	2016-01-06
5100150693	605.12	3	P Line missing	2016-02-03
5100151283	605.88	1	P_Complete	2016-02-07
5100148751	609.64	1	P_Complete	2016-01-09
2100159387	610.94	1	P_Complete	2016-01-18
5100151165	611.57	2	P_Complete	2016-02-08
5100091828	614.52	1	P_Complete	2016-01-25
5100142281	614.88	1	P_Complete	2016-01-01
5100085110	615.19	1	P_Complete	2016-12-16
5100094510	615.68	1	P_Complete	2016-02-13
2100160443	616.5	3	P Line missing	2016-02-03
5100094452	616.52	1	P_Complete	2016-02-06
5100093312	618.64	1	P_Blank	2016-01-12
6100093088	620	1	P_Complete	2016-07-09
5100087656	620.14	1	P_Complete	2016-06-14
5100150176	624	1	P_Complete	2016-01-25
2100160492	624.32	2	P_Complete	2016-02-03
5100089612	625.17	3	P_Complete	2016-05-25
5100151144	626.52	4	P_Complete	2016-02-07
5100093204	627.23	1	P_Blank	2016-01-11
5100143293	628.56	1	P_Complete	2016-03-10
5100150750	629.86	1	P_Complete	2016-02-01
5100094439	631.06	3	P_Complete	2016-02-09
5100147809	633.44	4	P_Complete	2016-04-27
5100149871	637	1	P_Blank	2016-01-23
5100091463	641.56	1	P_Complete	2016-04-05
6100089818	642.68	1	P_Complete	2016-10-03
6100094228	643.77	7	P_Complete	2016-06-17
5100093446	646.91	5	P Line missing	2016-01-15
2100160628	652.08	3	P_Complete	2016-02-09
5100150549	653.97	4	P_Complete	2016-01-26
2100160063	658.21	2	P_Complete	2016-02-20
5100092319	659.38	1	P_Complete	2016-04-21
5100150933	662.67	4	P Line missing	2016-02-03
2100156699	662.8	2	P_Complete	2016-04-19
6100098802	662.92	3	P Line missing	2016-02-06
2100160541	662.94	2	P Line missing	2016-02-03
5100146748	667	1	P_Complete	2016-04-16
5100146215	667.76	1	P_Complete	2016-04-15
5100143191	669.27	4	P_Complete	2016-03-30
5100146995	669.77	1	P_Complete	2016-04-20
2100153182	671.33	1	P_Complete	2016-02-03
2100160451	673.29	4	P Line missing	2016-02-02
2100152017	674.01	1	P_Complete	2016-05-11
5100150974	674.7	9	P_Complete	2016-02-09
5100150818	676.26	3	P_Complete	2016-02-01
5100146017	677.38	1	P_Complete	2016-04-07
2100146791	678.09	8	P_Complete	2016-07-31
5100150257	678.81	3	P_Complete	2016-01-25
5100140564	680.25	1	P_Complete	2016-05-10
5100151261	681.25	4	P_Complete	2016-02-10
6100098644	681.64	1	P_Blank	2016-02-08
5100093060	684	1	P_Complete	2016-01-11
5100150426	685.44	2	P_Complete	2016-02-28
5100092973	687.46	1	P_Blank	2016-01-05
5100149963	690.07	5	P_Complete	2016-01-23
5100151235	690.94	2	P_Complete	2016-02-08
5100148602	695.84	1	P_Complete	2016-01-10
5100150921	699.45	5	P Line missing	2016-02-03
5100150619	699.72	1	P_Complete	2016-01-30
5100151070	700.61	1	P_Complete	2016-02-09
5100094513	700.81	5	P_Complete	2016-02-10
5100149929	701.25	1	P_Blank	2016-01-20
5100151214	701.41	5	P_Complete	2016-02-07
2100160586	701.49	5	P_Complete	2016-02-07
5100148748	701.8	2	P_Complete	2016-01-12
2100160421	702.44	2	P_Complete	2016-10-20
5100150621	704.39	1	P_Complete	2016-02-15
5100140120	708.29	8	P_Complete	2016-06-28
2100160619	714.92	8	P Line missing	2016-02-08
5100093799	715.39	1	P_Complete	2016-01-22
5100151211	715.39	1	P_Complete	2016-02-07
5100089522	716.4	1	P_Complete	2016-05-26
5100150976	718.75	1	P_Complete	2016-02-09
5100139199	720	1	P_Complete	2016-03-30
5100094544	720.06	2	P_Complete	2016-02-10
5100150354	722.75	1	P_Complete	2016-02-02
5100150845	724.8	3	P_Complete	2016-02-03
5100138164	725.04	1	P_Complete	2016-06-28
5100094295	725.6	2	P_Complete	2016-02-09
2100160415	726.71	3	P Line missing	2016-02-03
5100150396	728	1	P_Complete	2016-02-02
5100151118	730.66	7	P InComplete	2016-02-09
6100085735	732.2	1	P_Complete	2016-02-03
6100094981	735.15	1	P_Complete	2016-05-10
5100150869	735.62	2	P_Complete	2016-02-02
5100094490	735.65	4	P_Complete	2016-02-10
5100151236	737.67	5	P_Complete	2016-02-07
2100155853	738.08	1	P_Complete	2016-04-07
5100151266	738.21	4	P_Complete	2016-02-09
5100094145	743.44	3	P_Complete	2016-01-30
6100098209	744	2	P_Complete	2016-01-19
5100146727	744.62	2	P_Complete	2016-01-20
5100151147	746.21	1	P_Complete	2016-02-07
5100090173	746.96	1	P_Complete	2016-03-07
5100094264	747.04	3	P_Complete	2016-02-02
5100150813	748.8	1	P_Complete	2016-02-01
6100094555	749.81	1	P_Complete	2016-06-25
2100160490	749.89	2	P_Complete	2016-02-03
6100098728	754.53	2	P_Complete	2016-02-06
5100150356	754.54	2	P_Complete	2016-02-02
5100094448	759.6	3	P_Complete	2016-02-04
5100087493	760	1	P_Complete	2016-06-12
5100090237	760	1	P_Complete	2016-03-15
5100150934	760	1	P_Complete	2016-02-09
2100160563	762.08	7	P Line missing	2016-02-03
6100094763	763.2	1	P_Complete	2016-05-04
6100098250	764.48	2	P_Complete	2016-01-22
5100150203	765.07	2	P_Complete	2016-02-10
2100160675	770.14	2	P_Complete	2016-02-08
6100098561	771.21	1	P_Complete	2016-02-07
6100093293	774.93	1	P_Complete	2016-07-16
5100093123	775.44	2	P_Blank	2016-01-11
5100150956	776.57	1	P_Complete	2016-02-03
5100147089	777.6	1	P_Complete	2016-04-30
5100151129	777.96	3	P InComplete	2016-02-09
5100151083	778.8	3	P_Complete	2016-02-04
5100094449	784.64	7	P_Complete	2016-02-04
5100148478	787.5	1	P_Complete	2016-02-01
5100092405	788.24	5	P_Complete	2016-04-30
5100148472	789.4	2	P_Complete	2016-01-08
5100094534	797.47	4	P_Complete	2016-02-08
5100150886	801.21	4	P_Complete	2016-02-20
5100150932	801.27	5	P_Complete	2016-02-09
5100151024	802.1	2	P_Complete	2016-02-10
5100143591	803.36	2	P_Complete	2016-03-08
5100094084	804	2	P_Complete	2016-01-29
5100094269	807.29	1	P_Blank	2016-02-02
5100094284	807.62	2	P_Blank	2016-02-06
2100160482	808.22	2	P Line missing	2016-02-04
5100150799	811.67	3	P_Complete	2016-02-05
5100150056	814	1	P_Blank	2016-01-25
5100151086	818	4	P_Complete	2016-02-05
6100090702	819.68	1	P_Complete	2016-10-24
5100094470	826.2	1	P_Blank	2016-02-07
5100149734	826.32	2	P_Complete	2016-01-25
5100148954	831.28	4	P_Complete	2016-01-10
5100089960	831.6	2	P_Blank	2016-03-01
6100098774	832.94	7	P Line missing	2016-02-07
5100090685	834.44	1	P_Complete	2016-03-22
6100096993	834.87	3	P_Complete	2016-04-15
5100094424	835.19	3	P Line missing	2016-02-04
6100094067	835.51	2	P_Complete	2016-06-11
5100151252	836.89	5	P_Complete	2016-02-07
6100096745	838.86	2	P_Complete	2016-04-08
5100093986	841.46	5	P Line missing	2016-01-25
5100151046	842.04	2	P_Complete	2016-02-04
5100150514	842.61	3	P_Blank	2016-01-30
5100151188	844.56	2	P_Complete	2016-02-10
5100093527	845.4	1	P_Complete	2016-01-20
5100094414	846.4	2	P_Complete	2016-02-09
2100151852	847.79	4	P_Complete	2016-05-30
5100144968	849.92	3	P_Complete	2016-03-29
5100150623	852.56	2	P_Complete	2016-02-15
5100090268	855.36	1	P_Complete	2016-03-20
2100021521	859	1	P_Blank	2016-08-01
5100148429	862.09	1	P_Blank	2016-01-10
5100146117	863.48	1	P_Complete	2016-04-07
2100160157	864	2	P_Complete	2016-01-30
5100093174	864	2	P_Complete	2016-01-10
5100150736	865.6	3	P Line missing	2016-10-01
2100154901	873.47	1	P_Complete	2016-03-23
2100160562	877.92	11	P InComplete	2016-02-04
6100082906	878.7	1	P_Complete	2016-04-13
2100160657	879.43	3	P_Complete	2016-02-06
5100092027	880.79	1	P_Complete	2016-04-20
5100147562	882	1	P_Complete	2016-04-26
6100094578	882	1	P_Complete	2016-06-26
6100098121	883.62	1	P_Blank	2016-01-18
5100150335	883.74	2	P_Complete	2016-01-26
5100090952	885.17	1	P_Complete	2016-03-23
5100093222	885.17	1	P_Complete	2016-01-10
2100155474	887.25	1	P_Complete	2016-03-30
5100094474	888.61	2	P_Complete	2016-02-16
5100142299	891	1	P_Complete	2016-05-26
2100156960	893.88	4	P_Complete	2016-04-21
5100093975	897.48	1	P_Blank	2016-01-26
5100136970	898.88	1	P_Complete	2016-07-26
6100095988	902.4	2	P_Complete	2016-06-25
6100098671	905.1	3	P Line missing	2016-02-03
5100150654	906.05	5	P Line missing	2016-01-30
5100093588	907.83	1	P_Complete	2016-01-17
5100093590	907.83	1	P_Complete	2016-01-18
5100093564	907.84	2	P Line missing	2016-01-17
6100087510	908.6	1	P_Complete	2016-08-04
5100088656	908.82	1	P_Complete	2016-05-06
5100088249	915.12	1	P_Complete	2016-05-25
5100093580	920.56	2	P_Complete	2016-01-20
6100098744	921.71	2	P_Complete	2016-02-09
2100155306	921.74	1	P_Complete	2016-03-29
5100150128	923.52	4	P_Complete	2016-01-25
5100149313	924.36	2	P Line missing	2016-01-17
2100157133	925.65	1	P_Complete	2016-04-22
5100094222	925.92	5	P Line missing	2016-02-03
5100151153	926.47	3	P_Complete	2016-02-20
5100093851	928.47	5	P Line missing	2016-01-23
5100088234	930.01	1	P_Complete	2016-05-02
5100141935	933.12	1	P_Complete	2016-05-19
5100150862	940.59	1	P_Complete	2016-02-03
5100148551	943.16	4	P_Complete	2016-02-20
2100156997	943.43	2	P Line missing	2016-04-21
5100151203	959.01	6	P Line missing	2016-02-15
5100094415	959.96	2	P_Complete	2016-02-04
2100156967	962.57	3	P_Complete	2016-04-20
5100085335	966.18	2	P_Complete	2016-07-25
5100140483	968.3	1	P_Complete	2016-05-04
5100094418	968.85	7	P_Complete	2016-02-04
5100150844	970.4	1	P_Blank	2016-02-09
5100094413	972.17	3	P_Complete	2016-02-08
2100155287	980.1	2	P_Complete	2016-03-30
5100151279	980.97	8	P_Complete	2016-02-08
2100158574	987.69	3	P_Complete	2016-01-30
5100150185	993.34	6	P Line missing	2016-01-24
5100149950	995.33	1	P_Complete	2016-01-25
5100148321	998.57	1	P_Complete	2016-01-04
6100091597	1001.63	2	P_Complete	2016-11-14
6100098786	1002.18	5	P_Complete	2016-02-06
5100148560	1009.74	5	P_Complete	2016-01-04
2100154898	1010.49	2	P_Complete	2016-03-24
5100086488	1011.5	1	P_Complete	2016-06-13
5100089917	1013.76	2	P_Complete	2016-05-31
5100093783	1016.63	2	P_Complete	2016-02-15
5100138357	1016.73	1	P_Complete	2016-06-07
5100150167	1025	1	P_Complete	2016-02-13
5100150297	1027.06	2	P_Complete	2016-01-26
5100149606	1029.17	1	P_Complete	2016-01-25
5100094436	1030.17	1	P_Complete	2016-02-08
5100150772	1030.26	3	P Line missing	2016-02-08
5100092778	1033.36	2	P Line missing	2016-01-04
6100098060	1033.49	2	P Line missing	2016-01-19
5100091356	1034.4	2	P_Complete	2016-04-04
5100092762	1035.5	1	P_Blank	2016-01-01
5100093661	1035.5	2	P_Blank	2016-01-18
5100094299	1038.65	4	P Line missing	2016-02-02
5100151220	1039.5	1	P_Complete	2016-02-08
5100150425	1042	2	P_Blank	2016-01-27
5100147449	1045.44	1	P_Complete	2016-01-15
5100151068	1046.6	2	P Line missing	2016-02-07
5100150106	1049.61	1	P_Complete	2016-01-25
6100094326	1049.95	8	P_Complete	2016-06-19
6100074929	1052.19	1	P_Blank	2016-07-14
5100149633	1052.9	5	P_Complete	2016-01-18
2100160672	1059.08	8	P Line missing	2016-02-06
5100151204	1060.27	3	P InComplete	2016-02-08
5100093394	1060.29	1	P_Complete	2016-01-13
2100020902	1064.06	1	P_Complete	2016-06-19
5100150432	1071.48	4	P_Blank	2016-01-30
6100003035	1073.45	1	P_Complete	2016-05-30
5100150929	1076.86	1	P_Complete	2016-02-07
5100093830	1085.06	10	P_Complete	2016-02-15
6100093811	1092	2	P_Complete	2016-06-03
5100136483	1092.63	4	P_Complete	2016-07-17
6100098445	1092.94	1	P_Complete	2016-01-26
5100148161	1102.63	3	P_Complete	2016-01-02
5100092424	1105.09	1	P_Complete	2016-04-27
5100094542	1108.54	3	P_Complete	2016-02-08
5100094348	1111.41	4	P Line missing	2016-02-15
5100151085	1114.12	2	P_Complete	2016-02-07
6100097199	1120.98	1	P_Blank	2016-04-21
5100151041	1125.18	1	P_Complete	2016-02-08
2100148226	1127.77	2	P_Complete	2016-02-20
5100090663	1128.12	2	P_Complete	2016-03-20
5100146342	1134	1	P_Complete	2016-04-25
6100098681	1134	1	P_Blank	2016-02-03
5100143647	1136.55	1	P_Complete	2016-03-15
5100151071	1140	1	P_Blank	2016-02-07
5100151075	1140	2	P_Complete	2016-02-09
5100092568	1152	1	P_Complete	2016-04-30
5100092978	1152	2	P_Complete	2016-01-08
6100084907	1152.9	1	P_Complete	2016-01-16
5100148266	1154.15	4	P_Complete	2016-01-30
5100150408	1160	6	P Line missing	2016-01-26
6100098508	1160	1	P_Blank	2016-01-29
5100151127	1163.45	1	P_Blank	2016-02-09
5100151139	1163.45	1	P_Blank	2016-02-14
5100093549	1164.36	1	P_Complete	2016-01-17
5100151056	1166.4	1	P_Complete	2016-02-09
5100151002	1166.59	8	P_Complete	2016-02-07
5100150689	1169.16	4	P_Complete	2016-02-01
5100151244	1169.56	4	P_Complete	2016-02-09
5100084823	1170.94	1	P_Complete	2016-12-10
5100145534	1178.79	4	P_Complete	2016-03-30
5100143940	1183.54	4	P_Complete	2016-03-20
5100149611	1186.48	3	P InComplete	2016-01-30
5100149208	1187.78	1	P_Blank	2016-02-28
5100093506	1188.07	12	P Line missing	2016-01-16
5100150631	1189.19	1	P_Blank	2016-01-30
5100140814	1190.7	1	P_Complete	2016-06-26
5100150292	1195.65	6	P Line missing	2016-02-03
5100147415	1198.34	4	P_Complete	2016-04-25
6100094259	1199.9	1	P_Complete	2016-06-17
2100149555	1202.95	1	P_Complete	2016-05-03
5100094039	1208.72	2	P_Complete	2016-01-29
5100147834	1212.75	1	P_Complete	2016-01-05
2100158701	1216.45	2	P_Complete	2016-02-10
5100151131	1230.78	4	P_Complete	2016-02-08
5100151271	1237.75	1	P_Complete	2016-02-10
5100144972	1240.84	5	P Line missing	2016-03-30
5100140535	1252.91	1	P_Complete	2016-05-10
5100139595	1253.12	6	P_Complete	2016-06-28
6100097405	1259.87	2	P_Complete	2016-04-28
5100150970	1260.46	2	P_Complete	2016-02-07
5100150957	1260.49	4	P Line missing	2016-02-03
5100094491	1262.93	11	P_Complete	2016-02-10
5100091704	1263.31	5	P_Complete	2016-04-07
5100151278	1263.86	1	P_Complete	2016-02-19
5100094540	1265.46	9	P_Complete	2016-02-08
5100093905	1266.84	1	P_Complete	2016-01-25
5100149918	1281.11	1	P_Complete	2016-01-22
2100160630	1291.64	2	P Line missing	2016-02-14
6100094282	1298.88	1	P_Complete	2016-06-17
5100094282	1311.55	2	P_Blank	2016-02-01
5100094516	1322.05	6	P Line missing	2016-02-07
5100151167	1324.87	6	P_Complete	2016-02-08
2100154709	1326.6	2	P_Blank	2016-03-23
2100160456	1336.76	1	P_Blank	2016-02-02
5100149719	1337.81	11	P_Complete	2016-01-25
5100094390	1344.98	4	P_Complete	2016-02-07
2100158584	1348.69	47	P Line missing	2016-01-18
5100094397	1356.26	1	P_Complete	2016-02-09
6100074897	1370.32	2	P_Complete	2016-07-04
6100079376	1378.12	1	P_Complete	2016-05-13
6100089731	1378.62	2	P_Complete	2016-10-01
5100138672	1378.91	1	P_Complete	2016-06-27
5100142616	1380.16	4	P_Complete	2016-03-15
5100094463	1382.67	1	P_Complete	2016-02-07
5100092249	1384.6	10	P_Complete	2016-04-30
5100150888	1384.98	4	P Line missing	2016-02-03
5100091256	1393.56	1	P_Complete	2016-03-29
5100151257	1395.11	4	P_Complete	2016-02-07
2100153785	1398.56	1	P_Complete	2016-03-06
6100098000	1401.31	3	P_Complete	2016-01-15
6100094345	1401.83	1	P_Complete	2016-06-19
6100097629	1404	1	P_Complete	2016-01-02
5100092647	1405.15	1	P_Blank	2016-04-28
5100093594	1408	2	P_Complete	2016-01-25
5100129598	1411.14	2	P_Complete	2016-11-20
5100093054	1417.88	2	P_Complete	2016-01-12
5100094412	1423.65	3	P_Complete	2016-02-10
2100158364	1429.34	3	P_Complete	2016-01-08
5100150470	1430.95	1	P_Blank	2016-02-03
6100098548	1431.61	10	P Line missing	2016-01-30
5100092343	1432.8	1	P_Complete	2016-04-25
2100160587	1435.79	4	P Line missing	2016-02-07
2100160076	1439.25	2	P_Complete	2016-01-29
2100159390	1449.8	1	P_Complete	2016-01-19
5100093483	1453.88	4	P Line missing	2016-01-17
5100151067	1454.36	4	P Line missing	2016-02-07
5100142432	1472.61	3	P_Complete	2016-03-15
5100093969	1474	2	P Line missing	2016-01-25
5100091796	1475.28	1	P_Complete	2016-04-28
2100136885	1478.39	2	P_Complete	2016-09-18
6100094417	1479.9	2	P_Complete	2016-06-23
2100160290	1481.19	1	P_Blank	2016-02-01
5100094305	1482.11	2	P_Complete	2016-02-03
5100146027	1488.24	1	P_Complete	2016-04-07
5100085172	1493.73	2	P_Complete	2016-07-02
5100092899	1499.91	7	P Line missing	2016-01-06
5100150941	1500	1	P_Blank	2016-02-06
5100143887	1501.64	5	P_Complete	2016-03-16
5100147682	1512	1	P_Complete	2016-04-28
2100158826	1516	1	P_Complete	2016-02-28
5100094457	1519.44	2	P_Complete	2016-02-07
5100139495	1520.4	1	P_Complete	2016-05-15
6100098090	1522.5	1	P_Blank	2016-01-17
6100098800	1533.04	3	P_Complete	2016-02-07
5100149901	1535.67	2	P_Complete	2016-01-23
5100150482	1542.42	4	P_Complete	2016-01-30
5100150961	1558.24	1	P_Complete	2016-02-03
5100092952	1572.97	3	P_Complete	2016-01-05
5100092277	1580.17	4	P_Complete	2016-02-17
2100158855	1594.78	1	P_Complete	2016-01-12
5100141823	1608	5	P Line missing	2016-05-30
6100091990	1611.15	7	P_Complete	2016-11-26
5100094441	1624.31	1	P_Complete	2016-02-07
5100090659	1637.01	2	P_Complete	2016-03-30
5100092661	1638	1	P_Complete	2016-01-18
5100087509	1643.3	1	P_Complete	2016-06-20
5100090171	1648.05	4	P_Complete	2016-03-07
2100157551	1650	1	P_Complete	2016-01-09
5100117543	1650.15	1	P_Complete	2016-04-30
5100092725	1652.81	1	P_Complete	2016-01-03
5100094447	1656.29	1	P_Complete	2016-02-06
5100092386	1656.96	1	P_Complete	2016-04-25
5100149698	1658.15	7	P Line missing	2016-01-18
6100098041	1664.19	1	P_Complete	2016-01-16
5100151253	1675.88	8	P_Complete	2016-02-12
5100094445	1676.8	4	P_Complete	2016-02-06
5100149973	1682.4	2	P_Complete	2016-01-25
5100087037	1690.68	5	P InComplete	2016-06-08
2100150108	1691.58	2	P_Complete	2016-06-17
6100096218	1697.54	1	P_Complete	2016-03-21
5100093457	1698.57	3	P_Complete	2016-01-17
2100160661	1700.28	3	P_Complete	2016-02-14
6100083241	1702	1	P_Complete	2016-04-19
5100094375	1710.84	7	P_Complete	2016-02-28
5100141711	1711.46	4	P_Complete	2016-05-20
2100159739	1713.6	2	P Line missing	2016-01-23
2100153291	1716.95	2	P_Complete	2016-05-30
6100098748	1722	3	P InComplete	2016-02-07
5100094078	1726.22	3	P_Complete	2016-01-30
5100151180	1728.48	1	P_Complete	2016-02-07
5100149346	1731.6	3	P_Complete	2016-01-16
5100141516	1736.7	5	P_Complete	2016-05-20
2100156445	1738.8	1	P_Complete	2016-02-21
5100094538	1739.23	2	P Line missing	2016-02-08
5100151189	1744.28	2	P_Complete	2016-02-07
6100096199	1744.55	4	P_Complete	2016-03-21
5100149853	1745.17	1	P_Blank	2016-01-23
5100093926	1751.96	4	P_Blank	2016-02-15
5100086285	1761.36	1	P_Complete	2016-07-21
5100146332	1764.48	1	P_Complete	2016-04-12
5100144403	1770.34	2	P_Complete	2016-03-23
2100159542	1772.32	2	P_Complete	2016-02-08
5100147883	1777.56	3	P_Complete	2016-01-05
2100150599	1779.36	1	P_Complete	2016-05-16
5100149097	1787.95	3	P Line missing	2016-01-15
5100150237	1791.14	4	P Line missing	2016-01-26
5100090693	1794.44	1	P_Complete	2016-03-29
5100094251	1794.44	1	P_Complete	2016-02-01
5100150801	1805.73	2	P_Blank	2016-02-02
5100147013	1805.92	1	P_Complete	2016-04-22
6100083873	1809.89	1	P_Complete	2016-04-30
2100137727	1815.12	2	P_Complete	2016-09-15
5100094506	1815.2	4	P Line missing	2016-02-07
5100087500	1817.71	4	P_Complete	2016-06-20
5100093585	1822.8	4	P_Complete	2016-01-25
5100093224	1832.5	5	P_Complete	2016-01-10
2100158257	1833.8	7	P Line missing	2016-01-20
2100157496	1836	1	P_Complete	2016-02-24
5100146312	1846.8	1	P_Complete	2016-04-25
5100146583	1848.63	7	P Line missing	2016-04-26
5100143925	1863	1	P_Complete	2016-03-16
5100150095	1863	1	P_Complete	2016-01-25
5100151197	1863.86	5	P_Complete	2016-02-07
2100160607	1865.15	4	P Line missing	2016-02-06
5100150412	1866.24	1	P_Blank	2016-01-26
5100093727	1872.56	1	P_Complete	2016-01-21
5100093876	1872.56	1	P_Complete	2016-01-25
6100082228	1879.91	1	P_Complete	2016-04-05
5100147547	1880	1	P_Complete	2016-04-28
6100095473	1891.12	3	P_Complete	2016-05-25
5100151098	1894.27	2	P_Complete	2016-02-04
5100149744	1903.4	5	P InComplete	2016-01-19
5100151285	1915.66	1	P_Complete	2016-02-07
6100095614	1922.97	13	P_Complete	2016-05-27
2100159983	1932.17	2	P Line missing	2016-01-27
5100088092	1932.47	2	P_Complete	2016-06-28
5100088700	1940.58	1	P_Complete	2016-05-30
5100148689	1940.89	1	P_Complete	2016-01-12
2100160232	1950.75	1	P_Complete	2016-02-07
5100088963	1951.8	5	P_Complete	2016-05-12
5100143786	1954.03	2	P_Complete	2016-03-08
2100152864	1959.9	2	P Line missing	2016-04-04
5100150328	1973.3	2	P Line missing	2016-01-29
6100096467	1979.7	2	P_Complete	2016-03-27
5100092406	1982.29	7	P_Complete	2016-01-18
5100146245	1996.45	3	P_Complete	2016-04-14
5100151170	2000.88	1	P_Complete	2016-02-09
5100081028	2002.2	3	P_Complete	2016-09-25
5100094063	2004.77	3	P_Complete	2016-02-01
5100088793	2009.28	1	P_Complete	2016-03-01
5100151262	2021.69	11	P_Complete	2016-02-28
5100142985	2024.19	12	P_Complete	2016-03-15
5100089743	2039.43	7	P InComplete	2016-03-15
5100150272	2046.42	1	P_Blank	2016-01-25
5100149107	2046.73	1	P_Complete	2016-01-15
2100160218	2046.85	1	P_Blank	2016-02-01
5100149123	2047.4	4	P InComplete	2016-02-15
5100091488	2057.53	1	P_Complete	2016-04-07
5100145626	2059.78	1	P_Complete	2016-04-07
5100092585	2059.94	2	P_Complete	2016-01-24
5100094478	2069.05	2	P_Complete	2016-02-10
5100089294	2069.88	1	P_Complete	2016-09-30
6100079461	2074.63	2	P_Complete	2016-05-13
5100143993	2080.78	3	P_Complete	2016-03-16
5100093935	2082.91	4	P Line missing	2016-01-24
6100095505	2083.48	15	P_Complete	2016-05-25
2100160155	2084.24	2	P_Complete	2016-01-30
2100156082	2086.99	2	P_Complete	2016-04-11
5100117549	2094.75	1	P_Complete	2016-04-30
5100091241	2095.42	2	P_Complete	2016-04-28
6100083057	2104.2	1	P_Complete	2016-04-15
5100094444	2107.11	2	P_Complete	2016-02-07
2100159723	2122.41	1	P_Blank	2016-01-24
5100150509	2122.7	15	P Line missing	2016-01-27
5100150894	2132.39	6	P_Complete	2016-02-07
2100020729	2138.4	1	P_Complete	2016-12-31
5100146697	2140.96	2	P_Complete	2016-04-14
2100160683	2141.1	2	P_Complete	2016-02-09
6100094485	2158.46	2	P_Complete	2016-06-24
2100159725	2160	5	P InComplete	2016-01-23
5100136201	2169.87	1	P_Complete	2016-07-14
5100150726	2181.35	1	P_Complete	2016-09-01
2100157141	2203.44	2	P_Complete	2016-04-25
2100151510	2209.69	4	P_Complete	2016-05-04
2100159929	2223	1	P_Blank	2016-01-30
6100098124	2224.32	7	P_Complete	2016-01-18
5100134635	2231.14	2	P_Complete	2016-12-16
5100147188	2235.6	1	P_Complete	2016-04-20
5100091172	2238.01	1	P_Complete	2016-03-29
5100094466	2244.97	4	P InComplete	2016-02-15
5100092095	2280.39	1	P_Complete	2016-04-20
2100160578	2281.16	4	P_Complete	2016-02-06
5100145987	2304	1	P_Complete	2016-04-20
6100094559	2306.98	6	P_Complete	2016-06-25
5100150731	2318.84	1	P_Complete	2016-01-30
5100094373	2322.9	4	P_Complete	2016-02-03
5100149224	2327.62	3	P Line missing	2016-01-18
5100086921	2340.94	4	P_Complete	2016-06-28
6100098119	2356.5	3	P_Complete	2016-01-18
5100092594	2375.84	2	P Line missing	2016-04-28
6100098434	2386.25	7	P InComplete	2016-01-26
5100081497	2387.75	9	P_Complete	2016-10-06
5100148979	2392.5	3	P_Complete	2016-01-12
5100148553	2400	1	P_Complete	2016-01-04
5100151136	2421.36	2	P_Complete	2016-02-07
5100150944	2425.9	2	P Line missing	2016-02-06
5100149189	2442.42	2	P Line missing	2016-01-17
5100145773	2442.93	1	P_Complete	2016-04-05
5100091261	2449.06	4	P_Complete	2016-04-28
2100021507	2451.83	7	P_Complete	2016-02-02
5100147660	2457.39	2	P_Complete	2016-04-30
6100096344	2459.76	5	P_Complete	2016-03-23
2100159101	2460	2	P_Blank	2016-01-21
5100093785	2465.73	6	P_Complete	2016-01-20
2100148857	2466.99	2	P_Complete	2016-07-28
5100093029	2468.06	5	P InComplete	2016-01-05
5100150817	2468.27	2	P_Complete	2016-02-01
5100094353	2468.57	6	P_Complete	2016-02-07
5100145918	2472.94	9	P_Complete	2016-04-07
2100154466	2486.67	1	P_Complete	2016-03-30
5100094501	2501.93	1	P_Complete	2016-02-28
5100143794	2511.9	12	P_Complete	2016-03-30
2100158730	2512.79	9	P_Complete	2016-01-12
5100150236	2523.6	1	P_Blank	2016-02-20
5100144795	2528.06	4	P_Complete	2016-04-20
6100093848	2530.06	1	P_Complete	2016-06-26
2100151103	2536.05	1	P_Complete	2016-05-30
2100145512	2544.87	15	P InComplete	2016-12-31
2100136614	2547.31	17	P_Complete	2016-08-30
2100159321	2553.6	1	P_Complete	2016-01-18
5100150860	2568.56	1	P_Complete	2016-02-06
6100093823	2571	2	P_Complete	2016-06-03
6100085142	2572.73	1	P_Complete	2016-01-19
5100139942	2582.36	1	P_Complete	2016-06-26
5100146784	2604.05	3	P_Complete	2016-04-15
5100092975	2622.45	20	P_Complete	2016-01-05
5100148234	2625	56	P_Complete	2016-01-30
5100145900	2628.9	2	P_Complete	2016-04-15
5100150916	2654.25	3	P Line missing	2016-02-03
5100145467	2673	1	P_Complete	2016-03-30
5100146775	2678.94	1	P_Complete	2016-04-20
5100093892	2679	1	P_Complete	2016-02-24
6100096827	2679.85	1	P_Complete	2016-04-09
2100160476	2683.58	5	P_Complete	2016-02-03
5100091322	2690.44	4	P_Complete	2016-03-30
5100149622	2708.54	9	P InComplete	2016-01-30
5100144771	2710.94	3	P_Complete	2016-03-22
5100148595	2714.45	1	P_Complete	2016-01-20
5100148259	2715	50	P Line missing	2016-01-30
5100144978	2727.06	2	P_Complete	2016-03-26
5100151054	2727.64	2	P Line missing	2016-02-06
5100138592	2736	1	P_Complete	2016-06-20
5100092678	2742.14	6	P_Complete	2016-01-25
5100148174	2745	73	P_Complete	2016-01-30
6100098588	2746.81	1	P_Complete	2016-02-01
2100158143	2751.35	3	P Line missing	2016-01-09
6100092257	2757	3	P_Complete	2016-12-30
5100094339	2765.16	8	P InComplete	2016-02-02
2100155697	2780	2	P_Complete	2016-04-29
5100145490	2784.51	2	P_Complete	2016-03-30
5100091723	2784.77	8	P Line missing	2016-04-08
5100151020	2785	2	P_Complete	2016-02-10
5100149505	2786.52	2	P_Complete	2016-01-30
6100098457	2797.18	11	P_Complete	2016-01-26
5100144443	2803.8	2	P_Blank	2016-02-24
6100098028	2807.21	1	P_Complete	2016-01-16
5100149157	2808.16	10	P InComplete	2016-01-12
2100021511	2824.22	2	P_Complete	2016-02-02
5100093133	2828.33	2	P_Blank	2016-01-10
2100155804	2840.01	6	P_Complete	2016-04-06
6100089716	2840.7	1	P_Complete	2016-10-01
2100139961	2864.57	1	P_Complete	2016-01-29
5100094407	2874.3	4	P Line missing	2016-02-03
2100154236	2879.76	3	P_Complete	2016-03-22
5100091603	2879.98	8	P Line missing	2016-04-06
2100021466	2880	1	P_Complete	2016-01-23
5100090887	2897.49	3	P_Complete	2016-03-26
5100151011	2910.9	2	P_Complete	2016-02-08
5100092971	2933.21	3	P_Complete	2016-01-30
5100150400	2935.94	5	P_Complete	2016-02-28
5100092108	2938.52	7	P_Complete	2016-04-19
6100098024	2938.8	2	P_Complete	2016-01-16
5100147556	2950.99	2	P_Complete	2016-04-26
5100094462	2955.29	2	P_Complete	2016-02-08
5100148041	2965.51	4	P_Complete	2016-01-02
5100093712	2975.04	2	P Line missing	2016-01-21
5100148698	2975.39	3	P_Complete	2016-01-15
5100145574	2977.01	4	P_Complete	2016-03-30
6100093369	2994.16	3	P_Complete	2016-07-20
5100143981	3020.92	5	P_Complete	2016-03-16
5100147376	3039.66	1	P_Complete	2016-04-21
5100150399	3060.05	2	P_Complete	2016-02-28
2100160692	3060.8	2	P_Complete	2016-02-07
5100089378	3083.36	3	P_Complete	2016-05-25
5100140213	3100.03	1	P_Complete	2016-03-15
5100146647	3118.9	2	P_Complete	2016-01-01
5100085790	3137.2	5	P InComplete	2016-07-08
6100098754	3141.83	9	P InComplete	2016-02-07
5100148585	3147.43	3	P_Complete	2016-01-09
5100149172	3170.66	2	P_Complete	2016-01-12
5100148076	3175.77	8	P_Complete	2016-01-05
2100152613	3190.6	2	P_Complete	2016-03-03
2100020357	3209.42	23	P_Complete	2016-12-31
5100148376	3247.5	26	P_Complete	2016-01-30
5100150634	3248.67	6	P Line missing	2016-02-22
5100148322	3265.11	2	P_Complete	2016-01-25
2100149283	3270	1	P_Complete	2016-06-04
5100150958	3276.79	5	P_Complete	2016-02-03
5100094242	3297.72	3	P_Complete	2016-02-02
5100092233	3299.98	4	P_Complete	2016-04-20
5100093372	3323.82	6	P InComplete	2016-01-16
5100146433	3325.63	14	P_Complete	2016-04-12
5100093318	3327.62	7	P_Complete	2016-02-06
5100150673	3331.25	2	P Line missing	2016-02-03
2100021165	3336.22	11	P_Complete	2016-04-30
5100093906	3347.37	6	P_Complete	2016-01-30
5100094280	3374.94	5	P Line missing	2016-02-02
5100150954	3403.25	5	P Line missing	2016-02-03
5100094492	3458.57	4	P_Complete	2016-02-10
5100094058	3480.78	11	P_Complete	2016-01-26
5100074408	3486.19	9	P_Complete	2016-04-16
5100093734	3519.56	4	P Line missing	2016-01-19
5100150863	3525.09	4	P_Complete	2016-02-02
2100160589	3537.44	3	P_Complete	2016-02-06
2100160568	3547.26	16	P Line missing	2016-02-07
6100094745	3553.05	2	P_Complete	2016-05-02
6100097961	3553.31	8	P_Complete	2016-02-01
5100142282	3556.13	7	P_Complete	2016-01-30
5100142278	3560.76	4	P_Complete	2016-01-01
5100093382	3604.15	4	P InComplete	2016-01-24
2100021422	3610.16	58	P InComplete	2016-01-12
5100142366	3610.59	2	P Line missing	2016-05-26
6100098453	3656.22	15	P InComplete	2016-01-25
6100097977	3694.48	5	P_Complete	2016-01-15
5100092517	3697.67	6	P_Complete	2016-01-26
6100093427	3701.52	2	P_Complete	2016-07-26
5100147282	3712.73	3	P_Complete	2016-04-28
5100144338	3718.42	7	P InComplete	2016-03-27
5100144501	3719.27	16	P_Complete	2016-03-30
6100096861	3732.7	3	P_Complete	2016-04-12
5100126007	3736.3	5	P Line missing	2016-09-12
5100149746	3740.92	13	P_Complete	2016-01-19
5100150386	3758.93	2	P Line missing	2016-02-03
6100096639	3784.2	12	P_Complete	2016-04-05
5100086739	3792.01	9	P_Complete	2016-06-16
5100144755	3807.3	2	P_Complete	2016-03-30
6100098723	3811.95	3	P Line missing	2016-02-06
6100098465	3819.9	3	P_Complete	2016-01-26
5100131512	3833.46	2	P_Complete	2016-11-30
5100093614	3874.41	5	P Line missing	2016-01-18
6100083638	3878.19	2	P_Complete	2016-04-26
2100159747	3921.58	4	P_Complete	2016-01-30
6100094802	3940.53	3	P_Complete	2016-05-04
5100149986	3951.7	6	P Line missing	2016-01-24
5100148719	3977.16	2	P_Complete	2016-02-15
5100092011	3986.76	5	P_Complete	2016-04-14
2100159947	4000.64	1	P_Complete	2016-01-25
5100149651	4092.2	8	P_Complete	2016-01-19
2100159912	4096.6	4	P InComplete	2016-01-26
6100098036	4117.2	5	P_Complete	2016-01-16
2100153228	4126.89	2	P_Complete	2016-05-30
5100090369	4127.82	13	P_Complete	2016-03-14
5100144495	4130.49	3	P_Complete	2016-03-30
2100159657	4146.67	1	P_Complete	2016-01-30
5100094273	4173.95	5	P_Complete	2016-02-01
5100150438	4179.22	7	P_Complete	2016-01-26
5100088166	4191.74	2	P_Complete	2016-06-26
5100087997	4199.01	13	P_Complete	2016-05-25
5100143912	4202.88	7	P_Complete	2016-04-30
2100158274	4215.75	1	P_Complete	2016-08-01
5100087190	4224	4	P_Complete	2016-06-10
5100138807	4258.62	7	P_Complete	2016-06-16
2100145382	4307.58	2	P_Complete	2016-02-28
5100093099	4316.86	1	P_Complete	2016-01-08
2100021183	4317.3	1	P_Complete	2016-03-25
6100098033	4330.8	2	P_Complete	2016-01-15
5100150827	4375.77	35	P Line missing	2016-02-03
5100146682	4388	1	P_Complete	2016-04-20
5100148686	4399.47	8	P_Complete	2016-01-12
5100147687	4419.27	7	P_Complete	2016-01-05
5100151018	4445.44	5	P Line missing	2016-02-07
5100146774	4445.53	5	P_Complete	2016-04-18
2100151555	4485.14	2	P_Complete	2016-01-30
6100078913	4509.16	1	P_Complete	2016-05-10
5100094536	4522.27	8	P Line missing	2016-02-08
2100158501	4535.05	33	P Line missing	2016-01-30
2100021184	4536.32	11	P_Complete	2016-03-03
5100149499	4543.72	3	P Line missing	2016-01-16
5100150398	4569.11	4	P Line missing	2016-02-28
5100150099	4579.05	3	P_Blank	2016-01-24
5100146646	4580.67	1	P_Complete	2016-04-30
5100089147	4637.88	9	P_Complete	2016-05-18
5100150931	4644.23	21	P InComplete	2016-02-02
5100150943	4660	3	P_Complete	2016-02-06
2100149660	4675.22	3	P_Complete	2016-05-30
5100150989	4742.38	12	P_Complete	2016-02-08
5100150336	4752.59	11	P Line missing	2016-01-26
5100147830	4756.13	7	P_Complete	2016-01-01
2100160462	4764.9	16	P Line missing	2016-02-02
5100141903	4789.2	1	P_Complete	2016-09-30
6100098334	4800	4	P_Complete	2016-01-24
5100147810	4838.2	3	P_Complete	2016-01-01
5100138684	4846.12	4	P_Complete	2016-06-27
6100098599	4856.44	9	P_Complete	2016-02-02
5100150967	4906.76	6	P_Complete	2016-02-06
5100094330	4917.59	1	P_Complete	2016-02-07
5100149021	4926	2	P_Complete	2016-01-18
5100144147	4989.92	5	P_Complete	2016-03-30
5100093808	4993.32	7	P_Complete	2016-02-15
5100094256	5003.99	7	P_Complete	2016-02-01
5100094258	5003.99	7	P_Complete	2016-02-01
5100138999	5008.57	5	P_Complete	2016-06-17
6100092608	5076.5	1	P_Complete	2016-12-15
2100160466	5082	4	P_Complete	2016-02-02
6100096707	5084.22	2	P_Complete	2016-04-07
5100138800	5091.64	9	P_Complete	2016-03-28
2100146645	5105.49	16	P InComplete	2016-07-31
5100147637	5108.21	2	P_Complete	2016-04-26
5100149389	5126.82	5	P_Complete	2016-01-16
2100159436	5194.24	99	P_Complete	2016-01-30
5100087777	5194.98	1	P_Complete	2016-06-18
6100093139	5196.81	1	P_Complete	2016-07-13
2100021166	5216.17	19	P_Complete	2016-04-30
5100087234	5263.74	1	P_Complete	2016-06-09
5100142134	5265.54	3	P_Complete	2016-01-01
2100160582	5299.34	1	P_Complete	2016-02-06
5100091371	5315.39	7	P_Complete	2016-03-30
5100149025	5336.22	2	P Line missing	2016-01-18
6100093279	5355.58	7	P_Complete	2016-07-16
5100151106	5369.1	3	P_Complete	2016-02-04
5100090120	5400.38	21	P Line missing	2016-03-15
5100151124	5423.67	8	P InComplete	2016-02-09
5100149058	5437.04	10	P_Complete	2016-01-30
2100159250	5440.68	6	P_Complete	2016-01-17
2100157030	5454.85	3	P_Complete	2016-04-29
5100148441	5461.77	6	P_Complete	2016-01-04
5100146123	5590.42	23	P_Complete	2016-04-14
2100147799	5591.17	4	P_Complete	2016-05-01
2100150611	5600.68	8	P_Complete	2016-02-03
5100146855	5603.29	9	P_Complete	2016-04-19
2100150110	5606.72	9	P InComplete	2016-08-31
2100150120	5606.72	11	P InComplete	2016-09-21
2100150122	5606.72	9	P InComplete	2016-10-19
5100143891	5689.07	5	P_Complete	2016-03-22
2100021474	5702.15	35	P_Complete	2016-01-30
5100150460	5709.85	21	P InComplete	2016-01-27
5100150547	5718.86	7	P_Complete	2016-02-01
2100158422	5736.71	4	P InComplete	2016-01-10
5100150718	5798.43	1	P_Blank	2016-01-30
5100146385	5801.04	5	P_Complete	2016-02-28
5100094541	5819.97	16	P_Complete	2016-02-28
2100156296	5850	1	P_Complete	2016-04-29
6100092949	5860.21	1	P_Complete	2016-07-07
2100150726	5884.16	37	P InComplete	2016-01-30
5100092843	5921.71	6	P_Complete	2016-01-10
5100092903	5959.31	3	P_Complete	2016-01-04
5100091922	5962.36	3	P Line missing	2016-04-13
2100160455	6010	2	P Line missing	2016-02-03
2100151055	6035.74	8	P_Complete	2016-06-27
2100153755	6036.31	9	P_Complete	2016-03-03
5100151194	6068.7	6	P_Complete	2016-02-09
5100094359	6120.14	5	P_Complete	2016-02-17
5100089301	6142.58	8	P_Complete	2016-05-25
5100150899	6171.94	1	P_Complete	2016-02-03
5100151256	6302.4	3	P_Complete	2016-02-07
5100149983	6312.59	6	P InComplete	2016-02-28
5100150191	6337.76	2	P_Complete	2016-01-24
5100093700	6346.32	16	P InComplete	2016-01-19
6100089941	6371.01	4	P_Complete	2016-10-06
5100146437	6384.84	3	P_Complete	2016-04-13
5100094097	6402.26	15	P InComplete	2016-01-29
5100145200	6418.01	3	P_Complete	2016-03-29
5100138630	6430.67	3	P_Complete	2016-06-11
5100148755	6478.38	22	P Line missing	2016-01-30
6100090796	6497.24	1	P_Complete	2016-11-10
5100151146	6512.29	12	P_Complete	2016-02-07
5100094133	6537.51	5	P_Complete	2016-02-15
5100150735	6558.73	5	P_Complete	2016-02-28
5100148250	6572.87	14	P InComplete	2016-01-03
5100147441	6584.6	1	P_Blank	2016-04-23
5100088094	6634.6	10	P_Complete	2016-05-25
6100090413	6640.52	1	P_Complete	2016-10-24
6100094507	6672.12	1	P_Complete	2016-06-24
5100150303	6734.11	8	P InComplete	2016-02-15
5100150306	6734.11	8	P InComplete	2016-02-15
5100150307	6734.11	8	P InComplete	2016-02-15
5100150308	6734.11	8	P InComplete	2016-02-15
5100150309	6734.11	8	P InComplete	2016-02-15
5100143795	6736.92	18	P_Complete	2016-03-12
5100150310	6778.61	8	P InComplete	2016-02-15
5100094253	6781.28	6	P_Complete	2016-02-01
5100145448	6848.49	3	P Line missing	2016-03-30
5100151101	6855.96	2	P Line missing	2016-02-15
2100138501	6862.88	4	P_Complete	2016-09-15
5100150305	6875.86	9	P InComplete	2016-02-15
5100094411	6879.26	4	P_Complete	2016-02-15
5100087508	6933.79	7	P_Complete	2016-06-15
5100117399	6955.81	1	P_Complete	2016-09-25
5100148128	6981.05	5	P_Complete	2016-01-04
5100137943	6984	1	P_Complete	2016-06-03
5100146734	6987.79	3	P_Complete	2016-04-15
5100088100	7089.94	11	P_Complete	2016-06-28
6100090414	7112.31	3	P_Complete	2016-10-24
5100145451	7120.2	2	P_Blank	2016-03-30
5100136986	7133.73	14	P_Complete	2016-07-31
6100098113	7137.08	2	P_Complete	2016-01-18
5100094537	7154.88	36	P_Complete	2016-02-07
2100159770	7177.32	2	P_Complete	2016-01-25
5100093027	7260.08	12	P_Complete	2016-01-10
5100090745	7281.66	8	P_Complete	2016-03-22
5100087812	7292.75	13	P_Complete	2016-06-20
5100136171	7295.04	3	P_Complete	2016-07-14
5100122705	7319.22	3	P Line missing	2016-09-25
5100149509	7319.52	1	P_Complete	2016-01-18
5100138624	7333.2	1	P_Complete	2016-06-10
5100150401	7339.92	3	P_Complete	2016-02-28
5100148845	7348.2	2	P_Complete	2016-01-15
5100139198	7377.99	2	P_Complete	2016-03-30
5100145037	7400	1	P_Complete	2016-04-07
5100091958	7405.61	20	P Line missing	2016-04-13
2100020932	7426.74	29	P InComplete	2016-04-30
6100098128	7441.2	4	P_Complete	2016-01-18
6100098684	7457.1	1	P_Blank	2016-02-28
5100140249	7470	10	P_Complete	2016-05-20
5100148476	7507.9	6	P_Complete	2016-01-08
5100094037	7508.7	2	P_Blank	2016-01-26
2100160193	7514.74	7	P_Complete	2016-02-20
5100149875	7558.03	18	P_Complete	2016-01-20
5100091446	7625.63	22	P_Complete	2016-04-04
5100103531	7734.13	6	P_Complete	2016-06-28
5100147459	7869.64	6	P InComplete	2016-04-23
5100150953	7871.8	3	P_Complete	2016-02-03
5100147626	7917.65	14	P Line missing	2016-01-18
5100091955	7928.92	9	P Line missing	2016-08-02
2100160229	7992	1	P_Complete	2016-02-01
5100146259	7994.88	1	P_Complete	2016-10-01
5100151099	8020.85	7	P Line missing	2016-02-07
5100150628	8046.45	13	P InComplete	2016-01-30
5100093025	8085.23	11	P Line missing	2016-01-30
5100143587	8090.73	30	P_Complete	2016-03-30
5100146142	8091.68	10	P_Complete	2016-08-09
5100146136	8091.71	1	P_Complete	2016-01-28
5100148703	8091.71	1	P_Blank	2016-08-24
[truncated: 275 more rows]
